RESEARCH ARTICLE

# Glucose Evokes Rapid $\text{Ca}^{2+}$ and Cyclic AMP Signals by Activating the Cell-Surface Glucose-Sensing Receptor in Pancreatic $\beta$ -Cells

Yuko Nakagawa, Masahiro Nagasawa, Johan Medina, Itaru Kojima\*

Department of Cell Biology, Institute for Molecular & Cellular Regulation, Gunma University, Maebashi, Japan

\* [ikojima@gunma-u.ac.jp](mailto:ikojima@gunma-u.ac.jp)

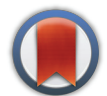

CrossMark  
click for updates

OPEN ACCESS

**Citation:** Nakagawa Y, Nagasawa M, Medina J, Kojima I (2015) Glucose Evokes Rapid  $\text{Ca}^{2+}$  and Cyclic AMP Signals by Activating the Cell-Surface Glucose-Sensing Receptor in Pancreatic  $\beta$ -Cells. PLoS ONE 10(12): e0144053. doi:10.1371/journal.pone.0144053

**Editor:** Makoto Kanzaki, Tohoku University, JAPAN

**Received:** October 9, 2015

**Accepted:** November 12, 2015

**Published:** December 2, 2015

**Copyright:** © 2015 Nakagawa et al. This is an open access article distributed under the terms of the [Creative Commons Attribution License](https://creativecommons.org/licenses/by/4.0/), which permits unrestricted use, distribution, and reproduction in any medium, provided the original author and source are credited.

**Data Availability Statement:** All relevant data are within the paper.

**Funding:** This research was supported by the Grant-in-Aid for Exploratory Research from the Ministry of Education, Science, Sports and Culture of Japan and #25670431, Japan Society for the Promotion of Science (<https://www.jsps.go.jp>) to IK. The funders had no role in study design, data collection and analysis, decision to publish, or preparation of the manuscript.

**Competing Interests:** The authors have declared that no competing interests exist.

## Abstract

Glucose is a primary stimulator of insulin secretion in pancreatic  $\beta$ -cells. High concentration of glucose has been thought to exert its action solely through its metabolism. In this regard, we have recently reported that glucose also activates a cell-surface glucose-sensing receptor and facilitates its own metabolism. In the present study, we investigated whether glucose activates the glucose-sensing receptor and elicits receptor-mediated rapid actions. In MIN6 cells and isolated mouse  $\beta$ -cells, glucose induced triphasic changes in cytoplasmic  $\text{Ca}^{2+}$  concentration ( $[\text{Ca}^{2+}]_c$ ); glucose evoked an immediate elevation of  $[\text{Ca}^{2+}]_c$ , which was followed by a decrease in  $[\text{Ca}^{2+}]_c$ , and after a certain lag period it induced large oscillatory elevations of  $[\text{Ca}^{2+}]_c$ . Initial rapid peak and subsequent reduction of  $[\text{Ca}^{2+}]_c$  were independent of glucose metabolism and reproduced by a nonmetabolizable glucose analogue. These signals were also blocked by an inhibitor of T1R3, a subunit of the glucose-sensing receptor, and by deletion of the T1R3 gene. Besides  $\text{Ca}^{2+}$ , glucose also induced an immediate and sustained elevation of intracellular cAMP ( $[\text{cAMP}]_c$ ). The elevation of  $[\text{cAMP}]_c$  was blocked by transduction of the dominant-negative  $G_s$ , and deletion of the T1R3 gene. These results indicate that glucose induces rapid changes in  $[\text{Ca}^{2+}]_c$  and  $[\text{cAMP}]_c$  by activating the cell-surface glucose-sensing receptor. Hence, glucose generates rapid intracellular signals by activating the cell-surface receptor.

## Introduction

Secretion of insulin is regulated by nutrients, neurotransmitters and hormones in pancreatic  $\beta$ -cells [1]. Among them, glucose is a primary stimulator of insulin secretion and is able to induce secretion by itself. Thus, when ambient glucose concentration rises, insulin secretion is initiated after a certain lag period [1]. The mechanism by which glucose stimulates insulin secretion has been investigated extensively for several decades [1, 2]. It was shown some decades ago that glucose induces complex changes in ion fluxes and membrane potential [3–6]. The resting

membrane potential of mouse  $\beta$ -cells is between -60 and -70 mV [3–5], which is determined mainly by high permeability of  $K^+$ . Elevation of ambient glucose leads to a gradual depolarization of 10 to 15 mV, which is followed by an initiation of action potentials. Initial depolarization induced by glucose is brought about by a decrease in  $K^+$  permeability of the plasma membrane. It is now known that glucose enters the cells, is metabolized through the glycolytic pathway and in mitochondria, and the resultant increase in ATP/ADP ratio causes closure of the ATP-sensitive  $K^+$  channel ( $K_{ATP}$  channel) [2, 5–7]. Closure of the  $K_{ATP}$  channel leads to gradual depolarization to a threshold, at which action potential driven by  $Ca^{2+}$  is initiated [4, 5, 7, 8]. Since it takes a minute or more for glucose to be metabolized, action potential starts after one to several minutes of lag time [7–8]. After the initial burst of action potential, the membrane potential returns to the level slightly below the resting potential, which is followed by cyclic changes in the membrane potential [4–6].

When changes in cytoplasmic  $Ca^{2+}$  concentration ( $[Ca^{2+}]_c$ ) are monitored in pancreatic  $\beta$ -cells, the addition of a high concentration of glucose reduces  $[Ca^{2+}]_c$  rather rapidly [9–11]. This initial decrease in  $[Ca^{2+}]_c$  lasts for a few minutes and is followed by an oscillatory elevation of  $[Ca^{2+}]_c$  [9–11]. The initial decrease in  $[Ca^{2+}]_c$  is thought to be due to sequestration of  $Ca^{2+}$  mainly to endoplasmic reticulum (ER) via the ER  $Ca^{2+}$  pump (SERCA) [12, 13]. In fact, initial decrease in  $[Ca^{2+}]_c$  is accompanied by an increase in  $Ca^{2+}$  concentration in ER [14, 15]. The role of this sequestration of  $Ca^{2+}$  to ER is not totally certain but it may be important for subsequent loading of  $Ca^{2+}$  into mitochondria. More importantly, the exact mechanism by which glucose stimulates sequestration of calcium into ER is not certain at present.

Besides changes in  $Ca^{2+}$ , glucose also increases cyclic 3', 5' AMP (cAMP) in pancreatic  $\beta$ -cells [16–18]. Elevation of cytoplasmic cAMP concentration ( $[cAMP]_c$ ) induced by a high concentration of glucose has been thought to be secondary to elevation of  $[Ca^{2+}]_c$  [18, 19]. In fact, pancreatic  $\beta$ -cells express adenylate cyclase (AC) isoforms, ACIII and ACVIII [20, 21]. ACVIII is a  $Ca^{2+}$ -calmodulin-activated AC and is also regulated by  $G_s$ . Presumably, elevation of  $[Ca^{2+}]_c$  activates calcium-dependent AC such as ACVIII, and increases production of cyclic AMP [19]. However, in a study using islets obtained from transgenic mice expressing a cAMP sensor Epac1-camps, Kim et al. [22] showed that glucose evoked a rapid elevation of  $[cAMP]_c$ , which preceded elevation of  $[Ca^{2+}]_c$ . This observation raises a possibility that increase in  $[cAMP]_c$  is rapid and at least partly independent of elevation of  $[Ca^{2+}]_c$ .

We have shown recently that subunits of the sweet taste receptor [23] are expressed in pancreatic  $\beta$ -cells [24]. Specifically, T1R3 subunit is abundantly expressed in  $\beta$ -cells while the protein expression of T1R2 is negligible [25]. Furthermore, the actions of sweet molecules are blocked by knockdown of T1R3 whereas knockdown of T1R2 was without effect. Based on these observations, we have speculated that a homodimer of the T1R3 functions as a cell-surface glucose-sensing receptor. Alternately, a heterodimer of T1R3 and another class C G protein-coupled receptor (GPCR) may function as a glucose-sensing receptor [26]. This receptor is activated by glucose and a nonmetabolizable analogue 3-O-methylglucose [26, 27]. Interestingly, activation of the glucose-sensing receptor by glucose facilitates its own metabolism in pancreatic  $\beta$ -cells [27]. Since activation of this receptor by artificial sweeteners leads to elevations of  $[Ca^{2+}]_c$  and  $[cAMP]_c$  in  $\beta$ -cells [24], it is reasonable to speculate that glucose modulates  $[Ca^{2+}]_c$  and  $[cAMP]_c$  in  $\beta$ -cells by acting on the glucose-sensing receptor. The present study was conducted to investigate whether or not the glucose-sensing receptor is involved in glucose-evoked intracellular signals. If this is the case, immediate changes in  $[Ca^{2+}]_c$  and  $[cAMP]_c$  should be observed. We therefore investigated whether glucose elicits immediate actions on  $[Ca^{2+}]_c$  and/or  $[cAMP]_c$  in pancreatic  $\beta$ -cells. The results show that glucose induces immediate changes in  $[Ca^{2+}]_c$  and  $[cAMP]_c$  by acting on the glucose-sensing receptor.

## Materials and Methods

### Chemicals

Nifedipine, N-methyl-D-glucamine (NMDG) and 3-O-methylglucose were purchased from Wako Pure Chemical Industries, Ltd (Tokyo, Japan).

### Cell Culture

MIN6 cells (passages 16–21) [28] were grown in Dulbecco's modified Eagle's medium 'high glucose' (Wako Pure Chemical Industries), 50  $\mu$ M  $\beta$ -mercaptoethanol, 1X Penicillin-Streptomycin Solution (Wako Pure Chemical Industries, Ltd) and 15% fetal bovine serum (Sigma-Aldrich, St. Louis, MO) and maintained in a humidified incubator of 95% air and 5% CO<sub>2</sub> at 37°C.

### Animals

The animal experiment was approved by the Animal Experiment and Ethics Committee, Gunma University School of Medicine (#25–0112), and was conducted according to the guidelines for animal care issued by the Committee. B6; 129-Tas1r3<sup>tm1Csz</sup>/J mice were purchased from the Jackson Laboratory (Bar Harbor, ME). They were kept in an experimental animal facility controlled at 23°C room temperature with a 12-hr light and dark cycle, and with free access to standard chow and water. The animal experiment was conducted according to the guidelines for animal care issued by Animal Experiment and Ethics Committee, Gunma University School of Medicine.

### Preparation of Pancreatic Islets

Islets were isolated from mouse pancreases using collagenase (Sigma-Aldrich). Single islet cells were prepared by shaking the islets in a Ca<sup>2+</sup> free HKR buffer (129 mM NaCl, 5 mM NaHCO<sub>3</sub>, 4.7 mM KCl, 1.2 mM KH<sub>2</sub>PO<sub>4</sub>, 1.2 mM MgSO<sub>4</sub>, 0.1% BSA and 10 mM HEPES/ NaOH [pH 7.4]) [29]. The single cells were plated on a 35 mm glass bottom culture dish (Mat Tek, Ashland, MA) coated with collagen (Cellmatrix Type I-C, Nitta Gelatin Inc., Osaka, Japan) and cultivated in Dulbecco's modified Eagle's medium 'low glucose' (Wako Pure Chemical Industries) containing 1X Penicillin-Streptomycin Solution and 10% FBS.

### Solution

Hanks' balanced salt solution (HBSS) contained 1.3 mM CaCl<sub>2</sub>, 5.4 mM KCl, 0.44 mM KH<sub>2</sub>PO<sub>4</sub>, 0.5 mM MgCl<sub>2</sub>, 0.38 mM MgSO<sub>4</sub>, 138 mM NaCl, 0.34 mM Na<sub>2</sub>HPO<sub>4</sub>, 2.8 mM D-glucose and 20 mM HEPES/ NaOH (pH 7.4). The Ca<sup>2+</sup>-free extracellular solution was prepared by removing CaCl<sub>2</sub> and by adding 0.2 mM EGTA. To remove extracellular sodium, sodium was replaced by NMDG.

### Measurement of cAMP and Activation of PKC

MIN6 cells were transiently transfected with plasmid encoding the cAMP indicator Epac1-camps [30] kindly provided by Dr. Lohse of the University of Würzburg (Germany) or the myristoylated alanine-rich C kinase substrate (MARCKS) fused with a green fluorescent protein (GFP), MARCKS-GFP [31]. The transfected cells were used to measure cAMP levels and PKC activation as previously described [24]. Knockdown of T1R3 was performed as described previously [29].

## Imaging of Cytoplasmic $\text{Ca}^{2+}$

Measurement of  $[\text{Ca}^{2+}]_c$  was performed by using a fluorescent  $\text{Ca}^{2+}$  indicator Fluo-8 (AAT Bioquest, Sunnyvale, CA). MIN6 cells and isolated  $\beta$ -cells were loaded with  $2 \mu\text{M}$  Fluo-8/AM dissolved in HBSS for 20 min at room temperature. To monitor  $[\text{Ca}^{2+}]_c$  using Cameleon-nano15, MIN6 cells were transfected with PM-Cameleon-nano15 [32] by electroporation as described previously [27]. The cells were placed on a 35 mm glass bottom culture dish. The cells were visualized with an Olympus UPlanAPO 10x Water Objective lens (Olympus, Tokyo, Japan). To detect fluorescence images, we used AQUACOSMOS/ASHURA, 3CCD based fluorescence energy transfer imaging system (Hamamatsu Photonics, Hamamatsu, Japan). Fluo-8 fluorescence was obtained by a U-MGFPHQ cube (Olympus), and expressed as the ratio of cytosolic fluorescence and initial intensity ( $F/F_0$ ). PM-Cameleon-nano15 fluorescence was obtained by a 440AF21 excitation filter (Omega Optical, Brattleboro, VT) and DM455DRLP dichroic mirror (Omega optical) and expressed as the ratio of CFP/YFP. These Images were captured with a C7780-22 ORCA3CCD camera (Hamamatsu Photonics) at 10-second intervals.

## Measurement of DAG

To assess diacylglycerol (DAG) production, MIN6 cells were transfected with C1-tagged monomeric red fluorescent protein ( $\text{C1}_2$ -mRFP) [33] by electroporation as described previously [27]. DAG levels were measured by using a prism-based TIRFM analysis [33].

## Statistical Analysis

Values are expressed as mean  $\pm$  SE. Statistical analysis was done by using Mann-Whitney's U-test. A  $p$  value of less than 0.05 was considered statistically significant.

## Results

### Effect of Glucose on Subplasmalemmal Free Calcium Concentration

We first examined whether glucose evoked a rapid effect on cytoplasmic  $\text{Ca}^{2+}$ . To this end, we monitored changes in  $[\text{Ca}^{2+}]_c$  in MIN6 cells using an ultrasensitive  $\text{Ca}^{2+}$  indicator, yellow Cameleon-nano15 [34] targeted to the plasma membrane (PM-Cameleon-nano15) [32]. PM-Cameleon-nano15 enabled us to monitor subtle changes in  $[\text{Ca}^{2+}]_c$  in these cells [32, 34]. When ambient glucose concentration was raised from 2.8 mM to 25 mM, an immediate transient elevation of  $[\text{Ca}^{2+}]_c$  was observed. A typical response of  $[\text{Ca}^{2+}]_c$  is shown in Fig 1A. This immediate elevation of  $[\text{Ca}^{2+}]_c$  was observed within seconds and  $[\text{Ca}^{2+}]_c$  peaked within 10 sec.  $[\text{Ca}^{2+}]_c$  then rapidly decreased to a plateau level, which was lower than the basal level.  $[\text{Ca}^{2+}]_c$  remained decreased for 1 to 5 min and then  $[\text{Ca}^{2+}]_c$  rose abruptly. The initial rapid peak of  $[\text{Ca}^{2+}]_c$  was observed in approximately 60% of the cells examined while the following plateau phase and the second large elevation of  $[\text{Ca}^{2+}]_c$  were observed in almost all of the cells tested. In cells without the rapid peak of  $[\text{Ca}^{2+}]_c$ , a small hump of  $[\text{Ca}^{2+}]_c$  was instead observed immediately after the addition of glucose (Fig 1B).  $[\text{Ca}^{2+}]_c$  was then reduced to a plateau level, which was lower than the basal level, and remained reduced for some minutes. Then  $[\text{Ca}^{2+}]_c$  rose abruptly and oscillatory elevation of  $[\text{Ca}^{2+}]_c$  was observed. Note that in cells without a rapid peak of  $[\text{Ca}^{2+}]_c$ , the area under the curve (AUC) of the subsequent oscillatory elevation of  $[\text{Ca}^{2+}]_c$  was smaller than that in cells with an initial rapid peak of  $[\text{Ca}^{2+}]_c$ . Thus AUC was significantly smaller than that in cells with a rapid peak of  $[\text{Ca}^{2+}]_c$  (Fig 1C). The initial rapid peak of  $\text{Ca}^{2+}$  or small hump of  $[\text{Ca}^{2+}]_c$  detected using PM-Cameleon-nano15 was never observed by monitoring  $[\text{Ca}^{2+}]_c$  using a conventional  $\text{Ca}^{2+}$  indicator fura-2. Thus, when  $[\text{Ca}^{2+}]_c$  was

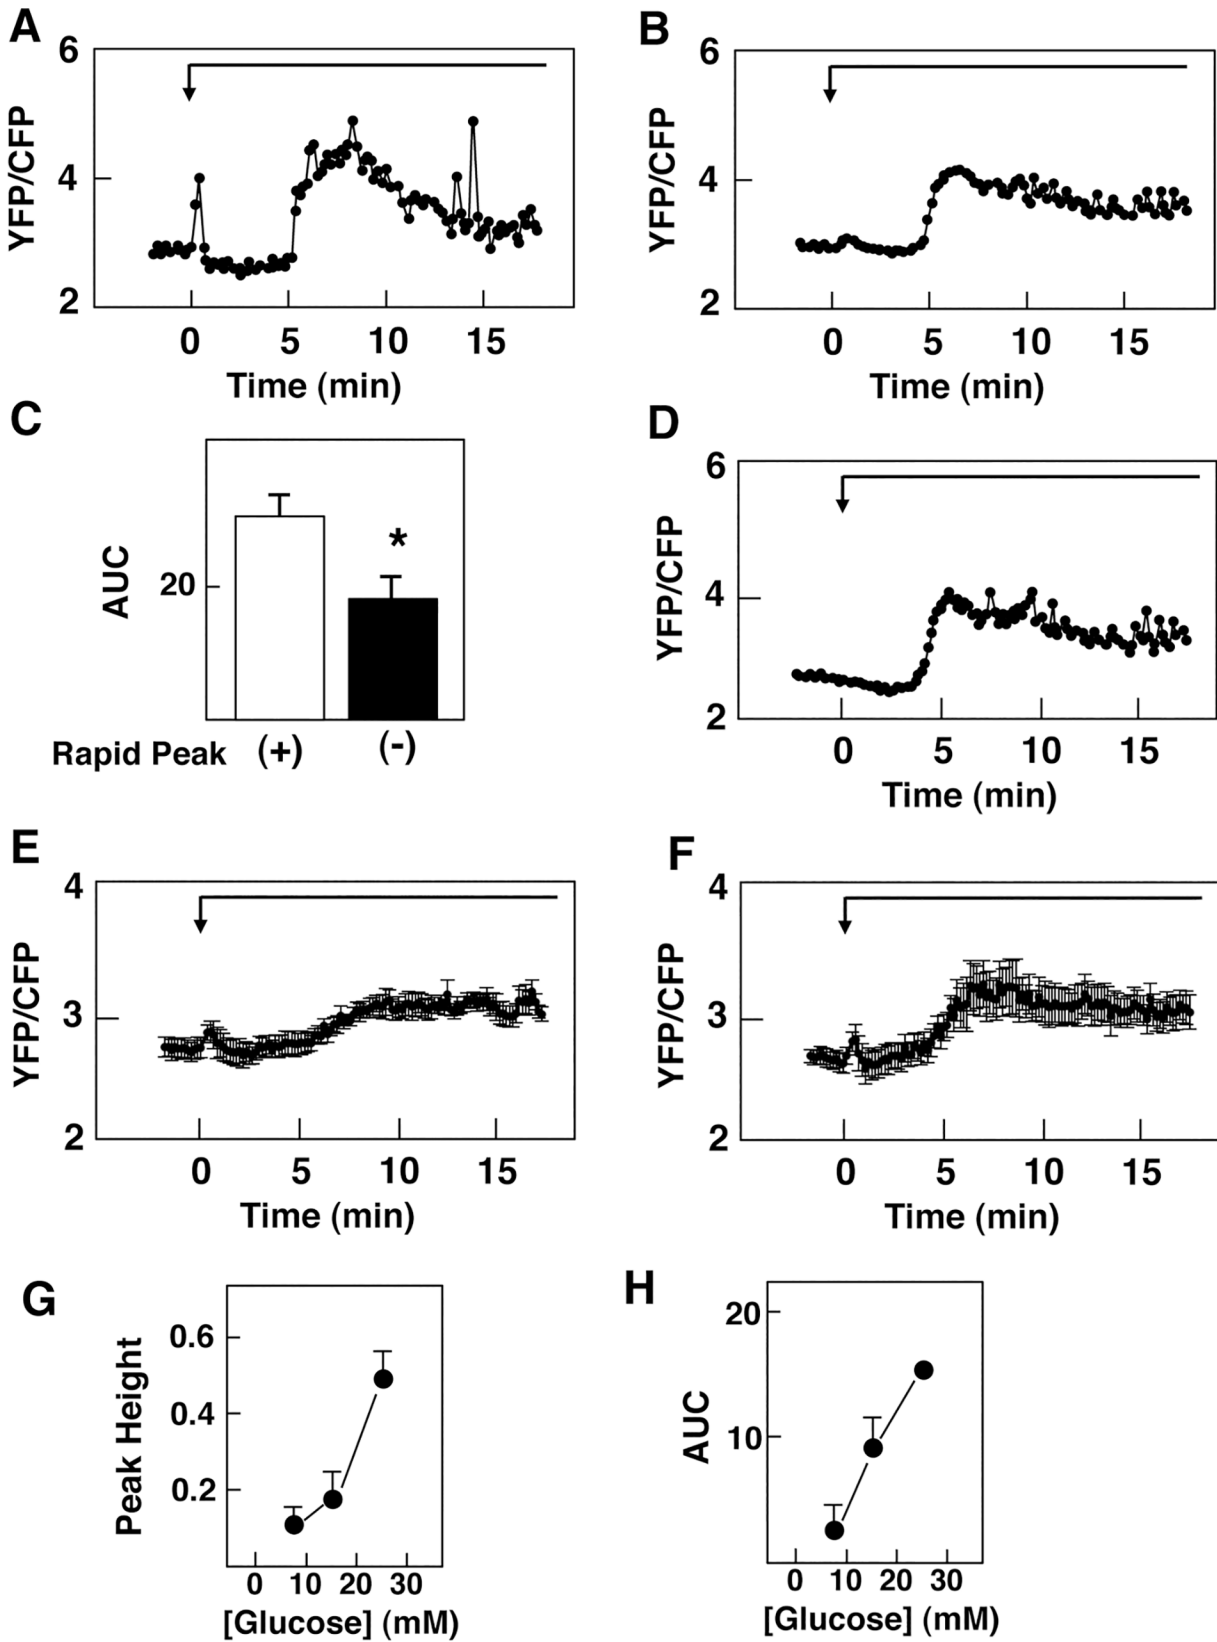

**Fig 1. Effect of Glucose on  $[Ca^{2+}]_c$  in MIN6 Cells.** A: M-Cameleon-nano15-expressing cells were incubated in HBSS containing 2.8 mM glucose. The cells were then stimulated by 25 mM glucose as indicated by the arrow and changes in  $[Ca^{2+}]_c$  were monitored. The result is a representative of those obtained in more than 300 cells from 10 experiments. B: Cells were treated as indicated above and a typical trace without the initial rapid peak is presented. The result is a representative of those obtained in more than 200 cells from 10 experiments. C: AUC of the oscillatory elevation of  $[Ca^{2+}]_c$  (between 5 and 15 min) was calculated in A and B. Values are the mean  $\pm$  SE of ten experiments. \*:  $P < 0.01$  vs 'with rapid peak'. D: PM-Cameleon-nano15-expressing cells were also loaded with fura-2 and stimulated by 25 mM glucose as indicated by the arrow. Changes in  $[Ca^{2+}]_c$  were monitored by using PM-Cameleon-nano15. E, F: PM-Cameleon-nano15-expressing cells were incubated in HBSS containing 2.8 mM glucose. Then cells were stimulated by 8.3 mM (E) or 16.7 mM (F) glucose and changes in  $[Ca^{2+}]_c$  were monitored. Results obtained in cells presenting a rapid peak of  $[Ca^{2+}]_c$  were shown. The results are the mean  $\pm$  SE for 10 determinations. G, H: PM-Cameleon-nano15-expressing cells were stimulated by various concentrations of glucose as shown in A, E and F and the peak height of the rapid peak (G) and AUC from 5 to 10 min were measured. Values are the mean  $\pm$  SE for 10 determinations.

doi:10.1371/journal.pone.0144053.g001

monitored by fura-2,  $[Ca^{2+}]_c$  was decreased by the addition of 25 mM glucose, and after some minutes of interval, elevation of  $[Ca^{2+}]_c$  was observed (data not shown). More importantly, when cells expressing PM-Cameleon-nano15 were simultaneously loaded with fura-2, the initial rapid elevation of  $[Ca^{2+}]_c$  monitored by PM-Cameleon-nano15 was abolished (Fig 1D). In other words, loading of fura-2 abolished the initial rapid peak of  $[Ca^{2+}]_c$ . Triphasic changes in  $[Ca^{2+}]_c$  were observed when cells were stimulated with 8.3 mM and 16.7 mM glucose (Fig 1E and 1F) and approximately 50% of the cells presented a rapid peak of  $[Ca^{2+}]_c$ . Both the first rapid peak and AUC of the second oscillatory elevation of  $[Ca^{2+}]_c$  were increased in dose-dependent manners (Fig 1G and 1H). The first rapid peak of  $[Ca^{2+}]_c$  was markedly inhibited by the addition of a non-specific inhibitor of phospholipase C (PLC) U73122 [35] (Fig 2A and 2B). Subsequent reduction of  $[Ca^{2+}]_c$  was also abolished by U73122 (Fig 2B). Note that an inactive analogue U73343 was without effect (data not shown). Likewise, the first rapid peak of  $[Ca^{2+}]_c$  and subsequent reduction of  $[Ca^{2+}]_c$  were markedly inhibited by the addition of a  $G_q$  inhibitor YM254890 [36] (Fig 2C). Quantitatively, the first peak of  $[Ca^{2+}]_c$  was significantly reduced by U73122 and YM254890 (Fig 2D). Similarly, the reduction of  $[Ca^{2+}]_c$  was abolished by both U73122 and YM254890 (Fig 2E). It should be noted that YM254890 also significantly inhibited large oscillatory elevation of  $[Ca^{2+}]_c$  induced by glucose (Fig 2F).

We tried to detect the rapid peak of  $[Ca^{2+}]_c$  by using conventional  $Ca^{2+}$  indicators and found that the initial rapid elevation of  $Ca^{2+}$  was detected by using fluo-8 in a fraction of the cells. As shown in Fig 3A, a rapid elevation of  $[Ca^{2+}]_c$  induced by 25 mM glucose was observed in approximately 40% of the fluo-8-loaded cells. In these cells, triphasic changes in  $[Ca^{2+}]_c$  were qualitatively similar to those observed by using PM-Cameleon-nano15. When extracellular  $Ca^{2+}$  was removed, glucose-mediated initial peak of  $[Ca^{2+}]_c$  was observed but the large elevation of  $[Ca^{2+}]_c$  observed several minutes later was markedly inhibited (Fig 3B). Similar results were obtained when cells were stimulated by 25 mM glucose in the presence of 1  $\mu$ M nifedipine, an inhibitor of L-type voltage-gated calcium channel (Fig 3C). Note that the rapid peak of  $[Ca^{2+}]_c$  was smaller compared to Fig 3A. We then assessed the involvement of the glucose-sensing receptor in glucose-induced changes in  $[Ca^{2+}]_c$ . We first blocked glucose metabolism by adding mannoheptulose, an inhibitor of glucokinase. In the presence of 10  $\mu$ M mannoheptulose, glucose induced a rapid elevation of  $[Ca^{2+}]_c$  and subsequent sustained reduction of  $[Ca^{2+}]_c$ . The magnitude of the first peak of  $[Ca^{2+}]_c$  was smaller compared to that in the absence of mannoheptulose. A large elevation of  $[Ca^{2+}]_c$  observed after a lag period of some minutes was blocked (Fig 3D). Similar results were obtained by adding a nonmetabolizable glucose analogue, 3-O-methylglucose, instead of glucose. Thus, 3-O-methylglucose induced a rapid elevation of  $[Ca^{2+}]_c$  and subsequent reduction of  $[Ca^{2+}]_c$ . However, a large elevation of  $[Ca^{2+}]_c$  after a lag period of some minutes was not observed (Fig 3E). When the glucose-sensing receptor was blocked by adding lactisole, an inhibitor of T1R3 [37], glucose did not induce a rapid elevation of  $[Ca^{2+}]_c$  (Fig 3F). Subsequent reduction of  $[Ca^{2+}]_c$  was not observed. In

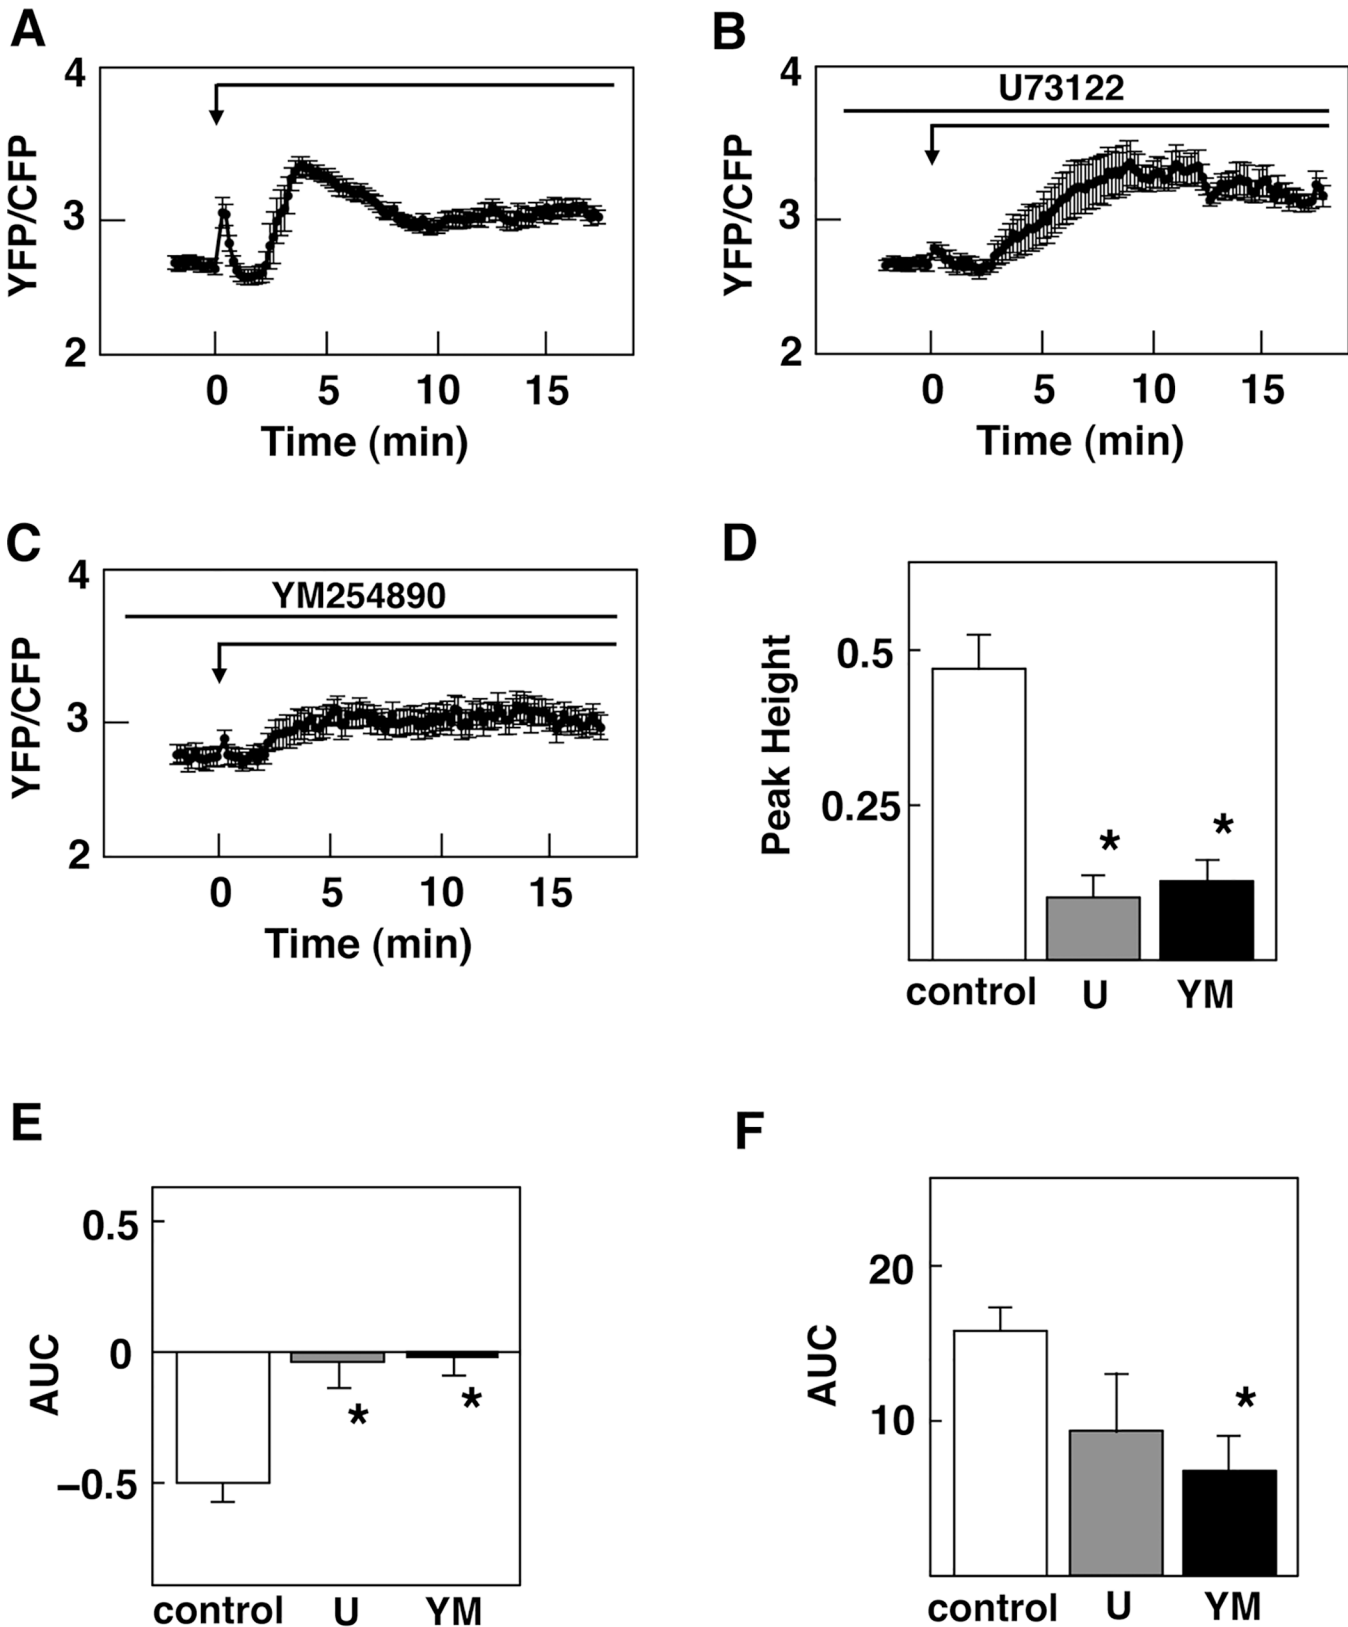

**Fig 2. Effect of U73122 and YM254890 in Glucose-induced Changes in  $[Ca^{2+}]_c$ .** A: PM-Cameleon-nano15-expressing cells were stimulated by 25 mM glucose as shown by the arrow and changes in  $[Ca^{2+}]_c$  were monitored. Values are the mean  $\pm$  SE for 10 determinations. B: PM-Cameleon-nano15-expressing cells were stimulated by 25 mM glucose in the presence of 10  $\mu$ M U73122, which was added 10 min prior to the addition of glucose.

Values are the mean  $\pm$  SE for 10 determinations. C: PM-Cameleon-nano15-expressing cells were stimulated by 25 mM glucose in the presence of 10  $\mu$ M YM254890, which was added 10 min prior to the addition of glucose. Values are the mean  $\pm$  SE for 10 determinations. D: Experiments were carried out as shown in A, B and C. The peak height of the first rapid peak was measured. YM: YM254890, U: U73122. \*:  $P < 0.01$  vs control. E: Experiments were carried out as shown in A, B and C. AUC from 1.2 to 2.0 min was calculated. YM: YM254890, U: U73122. \*:  $P < 0.01$  vs control. F: Experiments were carried out as shown in A, B and C. AUC from 3 to 10 min was calculated. Values are the mean  $\pm$  SE for 10 determinations. YM: YM254890, U: U73122. \*:  $P < 0.05$  vs control.

doi:10.1371/journal.pone.0144053.g002

contrast, elevation of  $[Ca^{2+}]_c$  was observed several minutes later. Quantitatively, the decrease in  $[Ca^{2+}]_c$  was abolished by lactisole (Fig 3G).

## Effect of Glucose on cAMP

We next monitored changes in  $[cAMP]_c$  induced by glucose using a cAMP indicator Epac1-camps [30]. When Epac1-camps-expressing MIN6 cells were stimulated by 25 mM glucose, a rapid and sustained elevation of  $[cAMP]_c$  was observed (Fig 4A). Elevation of  $[cAMP]_c$  was observed within 10 sec of the addition of glucose, and  $[cAMP]_c$  reached a plateau level approximately 1 min after the addition of glucose. When changes in  $[cAMP]_c$  and  $[Ca^{2+}]_c$  were monitored simultaneously in Epac1-camps-expressing cells loaded with fura-2, glucose induced reduction of  $[Ca^{2+}]_c$  and the elevation of  $[cAMP]_c$  were observed even in the same period (Fig 4B), indicating that  $[cAMP]_c$  was increased when  $[Ca^{2+}]_c$  was reduced. Glucose-induced elevation of  $[cAMP]_c$  was observed at a concentration of 8.3 mM and was increased in a dose-dependent manner (Fig 4C). Elevation of  $[cAMP]_c$  was observed even in the absence of extracellular  $Ca^{2+}$  (Fig 4D). AUC of the  $[cAMP]_c$  response in the absence of extracellular calcium was not changed significantly compared to that in the presence of extracellular calcium (Fig 4E). On the other hand, the elevation of  $[cAMP]_c$  was abolished by introducing dominant-negative  $G_s$  (Fig 4F and 4G). Note that dominant-negative  $G_s$  did not affect the elevation of  $[cAMP]_c$  induced by depolarizing concentration of KCl (data not shown). This rapid elevation of  $[cAMP]_c$  was observed in the presence of mannoheptulose (Fig 4H). Furthermore, 3-O-methylglucose, a nonmetabolizable analogue of glucose, essentially reproduced the effect of glucose (Fig 4I). When T1R3 was knocked down, glucose-induced elevation of  $[cAMP]_c$  was markedly inhibited (Fig 4J).

## Effect of Glucose on Activation of Protein Kinase C

We then measured changes in DAG. As shown in Fig 5A, the addition of 25 mM glucose induced a rapid and monophasic increase in DAG. Elevation of DAG was detected within 10 sec and the peak was observed around 3 min of stimulation by glucose. We then monitored activation of protein kinase C by monitoring phosphorylation state of MARCKS in cytosol, a substrate for protein kinase C that translocates from the plasma membrane to cytosol upon phosphorylation [31]. As shown in Fig 5B, the addition of 25 mM glucose induced biphasic elevation of phosphorylated MARCKS in cytosol. An initial increase was observed within 20 sec and peaked at 2 to 3 min after the addition of glucose. The second larger peak of phosphorylated MARCKS in cytosol was observed 5 to 7 min after the addition of glucose. When mannoheptulose was included to block metabolism of glucose, the first peak was observed whereas the second peak was abolished (Fig 5C). Addition of 3-O-methylglucose, a nonmetabolizable glucose analogue, evoked the first peak whereas the second peak was not observed and the level of phosphorylated MARCKS in cytosol was decreased gradually (Fig 5D). Results of the quantitative analyses of the effects of mannoheptulose and 3-O-methylglucose are shown in Fig 5E and 5F.



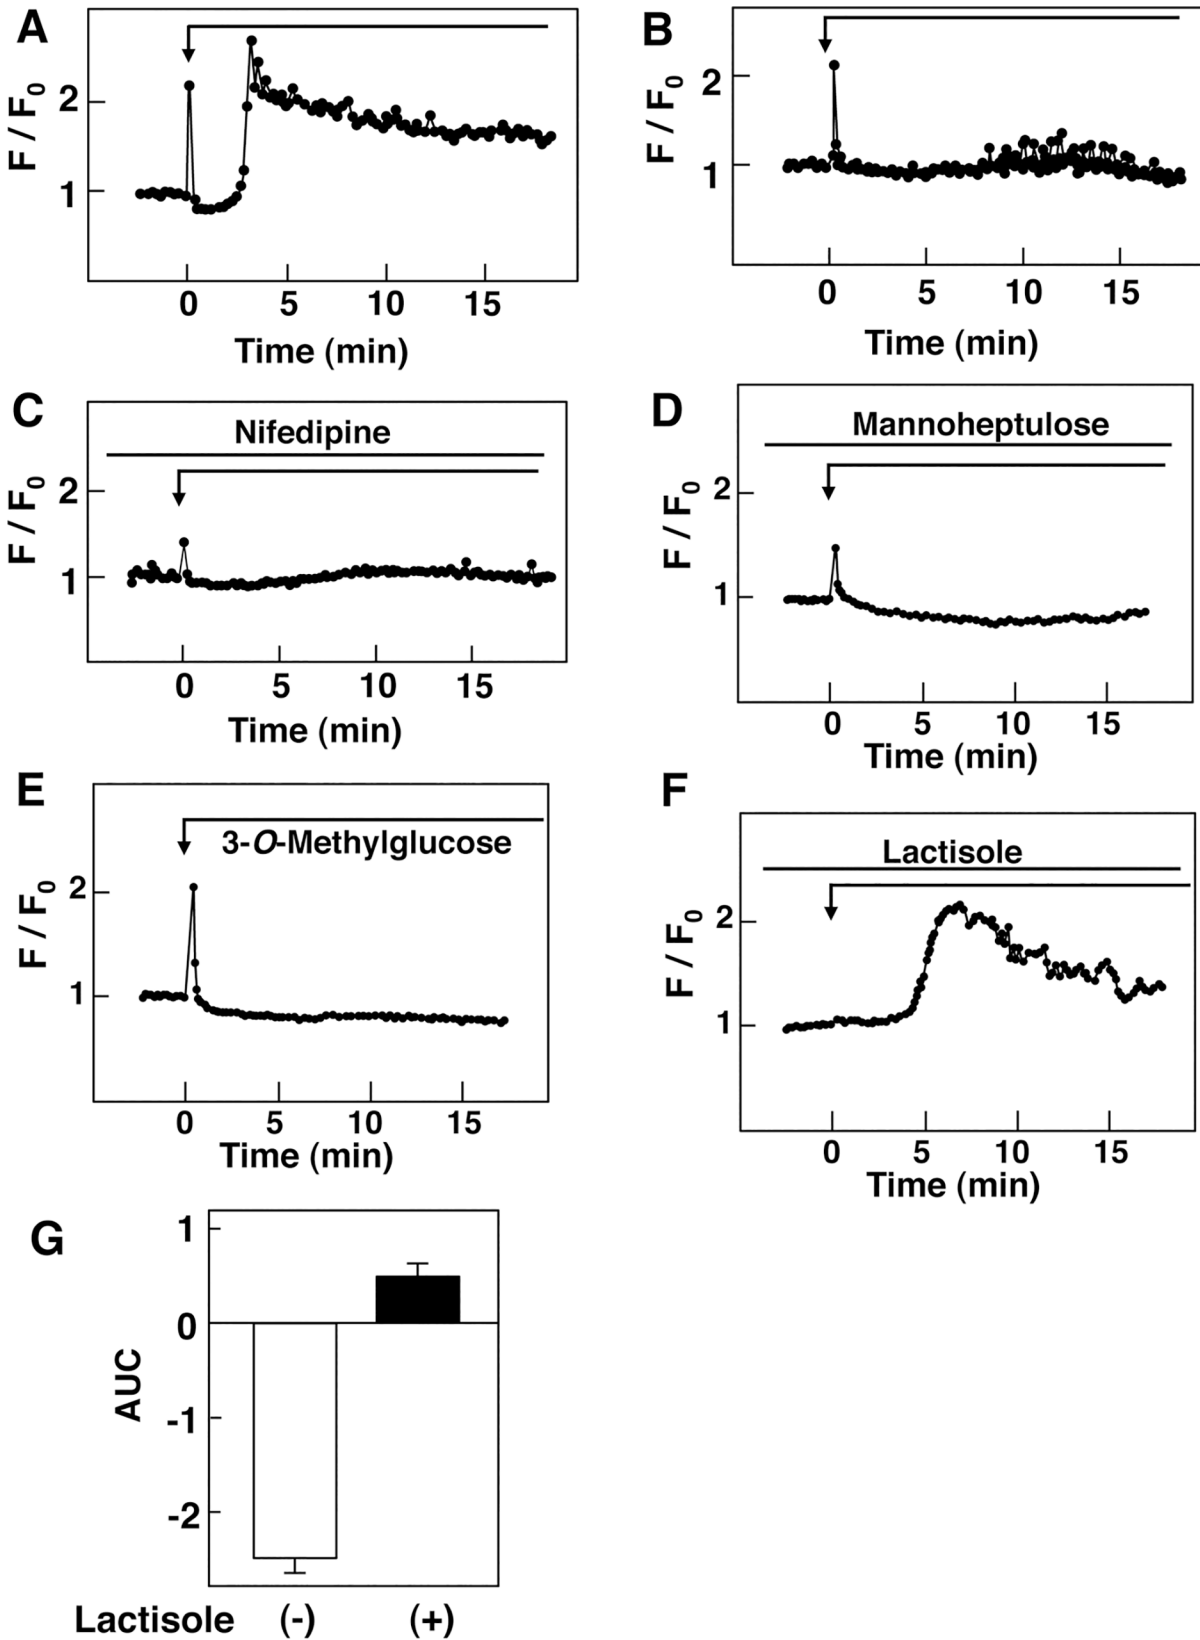

**Fig 3. Effect of Glucose and 3-O-Methylglucose on  $[Ca^{2+}]_c$  Measured by Fluo-8.** A: Fluo-8-loaded cells were stimulated by 25 mM glucose and changes in  $[Ca^{2+}]_c$  were measured. A typical response with a rapid peak is presented. The trace is a representative of those obtained in more than 100 cells. B: Fluo-8-loaded cells were incubated in  $Ca^{2+}$ -free HBSS and stimulated by 25 mM glucose as shown by the arrow. The trace is a representative of those obtained in more than 100 cells. C: Fluo-8-loaded cells were stimulated by 25 mM glucose in the presence of 1  $\mu$ M nifedipine, which was added 10 min prior to the stimulation by glucose. Changes in  $[Ca^{2+}]_c$  were monitored. The trace is a representative of those obtained in more than 100 cells. D: Fluo-8-loaded cells preincubated for 10 min with 10 mM mannoheptulose were stimulated with 25 mM glucose as indicated by the arrow. The trace is a representative of those obtained in more than 100 cells. E: Fluo-8-loaded cells were stimulated by 25 mM 3-O-methylglucose and changes in  $[Ca^{2+}]_c$  were monitored. The trace is a representative of those obtained in more than 100 cells. F: Fluo-8-loaded cells were stimulated by 25 mM glucose in the presence of 5 mM lactisole, which was added 10 min prior to the stimulation by glucose. Changes in  $[Ca^{2+}]_c$  were monitored. The trace is a representative of those obtained in more than 100 cells. G: Experiments were carried out as shown in F and AUC from 1 to 5 min was calculated. Values are the mean  $\pm$  SE for 10 determinations.

doi:10.1371/journal.pone.0144053.g003

## Effect of Glucose on Cytoplasmic $Ca^{2+}$ in $\beta$ -cells Obtained From Normal and T1R3-knockout Mice

To further confirm the role of the glucose-sensing receptor, we studied the effect of glucose on  $[Ca^{2+}]_c$  in  $\beta$ -cells obtained from normal and T1R3-knockout mice by using a  $Ca^{2+}$  indicator fluo-8. In normal  $\beta$ -cells, a high concentration of glucose induced a rapid peak of  $[Ca^{2+}]_c$  in approximately 45% of the cells examined. After the sharp peak of  $[Ca^{2+}]_c$ ,  $[Ca^{2+}]_c$  then reduced to a value below the basal level. After a lag period of approximately 5 min, a large elevation of  $[Ca^{2+}]_c$  was observed (Fig 6A). In cells without the rapid peak of  $[Ca^{2+}]_c$ , glucose induced a gradual decrease in  $[Ca^{2+}]_c$ , which was followed by an abrupt elevation of  $[Ca^{2+}]_c$  (Fig 6B).  $[Ca^{2+}]_c$  remained elevated for more than 10 min. In T1R3-null  $\beta$ -cells, the glucose-induced rapid peak of  $[Ca^{2+}]_c$  was never observed. Moreover, a high concentration of glucose did not cause a decrease in  $[Ca^{2+}]_c$ . After a lag period of approximately 7 min, an increase in  $[Ca^{2+}]_c$  was observed (Fig 6C). Compared to that in normal  $\beta$ -cells, elevation of  $[Ca^{2+}]_c$  was blunted. Quantitatively, initial decrease in  $[Ca^{2+}]_c$  induced by glucose was abolished in T1R3-null  $\beta$ -cells (Fig 6D). The onset of the large elevation of  $[Ca^{2+}]_c$  was significantly delayed in T1R3-null  $\beta$ -cells (Fig 6E). In addition, AUC of the elevation of  $[Ca^{2+}]_c$  induced by high concentration of glucose was markedly reduced in T1R3-null  $\beta$ -cells (Fig 6F). We then examined the effect of 3-O-methylglucose on  $[Ca^{2+}]_c$  in normal  $\beta$ -cells. As shown in Fig 7A, addition of 3-O-methylglucose induced a rapid elevation of  $[Ca^{2+}]_c$ , which was followed by a sustained decrease in  $[Ca^{2+}]_c$  in normal  $\beta$ -cells. The initial rapid peak of  $[Ca^{2+}]_c$  was observed in approximately 40% of the cells. In the rest of cells, the initial rapid peak was not observed and  $[Ca^{2+}]_c$  was decreased in response to 3-O-methylglucose (Fig 7B). In contrast, 3-O-methylglucose did not induce a rapid peak of  $[Ca^{2+}]_c$  nor a sustained decrease in  $[Ca^{2+}]_c$  in T1R3-null  $\beta$ -cells (Fig 7C). Quantitatively, sustained decrease in  $[Ca^{2+}]_c$  induced by 3-O-methylglucose was abolished in T1R3-null  $\beta$ -cells (Fig 7D).

We then measured changes in  $[cAMP]_c$  induced by glucose in normal  $\beta$ -cells. As shown in Fig 7E, glucose evoked a rapid and sustained elevation of  $[cAMP]_c$ . Elevation of  $[cAMP]_c$  was observed within 10 sec. In contrast, glucose did not increase  $[cAMP]_c$  in T1R3-null  $\beta$ -cells (Fig 7F). Quantitatively, elevation of  $[cAMP]_c$  induced by glucose was markedly reduced in T1R3-null  $\beta$ -cells (Fig 7G).

## Discussion

The present study was conducted to detect receptor-mediated rapid signals evoked by glucose in pancreatic  $\beta$ -cells. Using an ultrasensitive  $Ca^{2+}$  indicator Cameleon-nano15 [34] targeted to the plasma membrane [32], we could detect subtle changes in  $[Ca^{2+}]_c$  in  $\beta$ -cells. As shown in

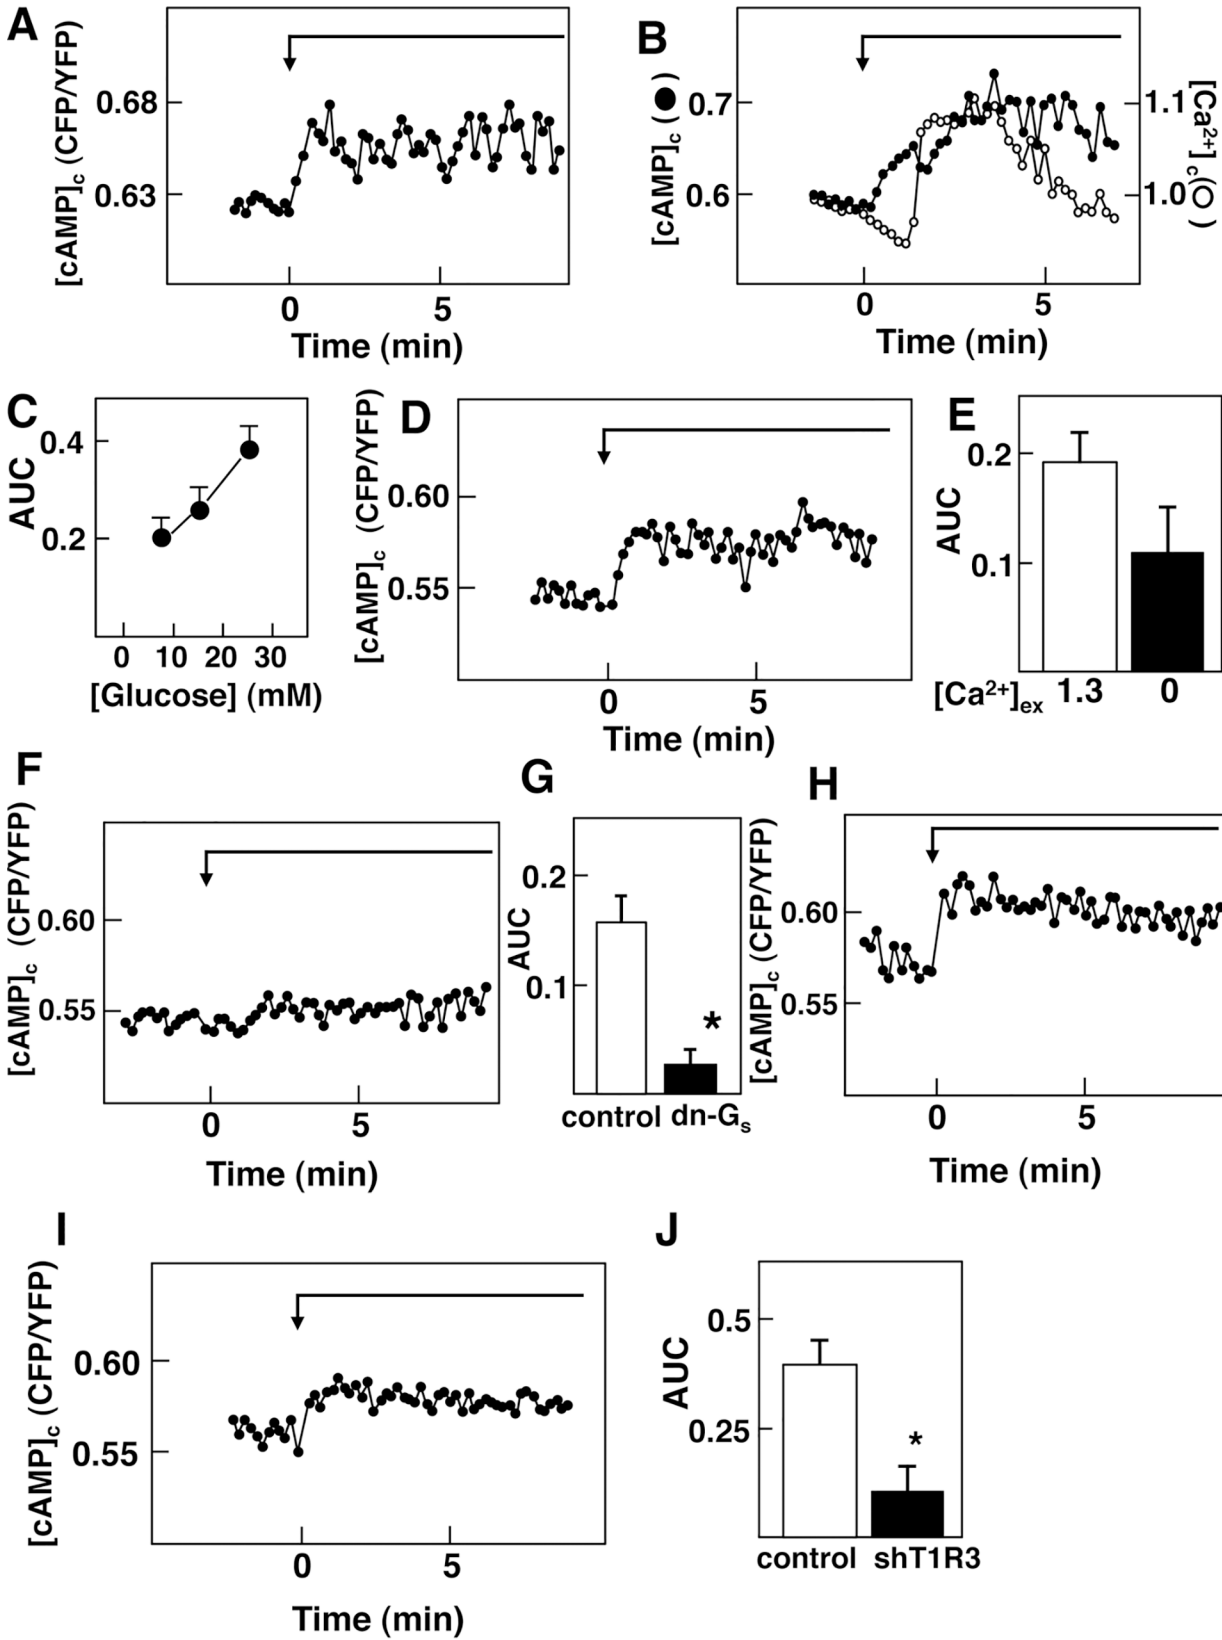

**Fig 4. Effect of Glucose on [cAMP]<sub>c</sub> in MIN6 Cells.** A: Epac1-camps-expressing cells were stimulated by 25 mM glucose and changes in [cAMP]<sub>c</sub> were monitored. The result is a representative of those obtained in more than 100 cells. B: Epac1-camps-expressing cells loaded with fura-2 were stimulated by 25 mM glucose and changes in [cAMP]<sub>c</sub> (●) and [Ca<sup>2+</sup>]<sub>c</sub> (○) were monitored simultaneously. The result is a representative of those obtained in 25 cells. C: Epac1-camp-expressing cells were stimulated by 8.3, 16.7 and 25 mM glucose and AUC of the [cAMP]<sub>c</sub> response from 0 to 8 min was calculated. Values are the mean ± SE for 8 determinations. D: Epac1-camps-expressing cells were incubated in Ca<sup>2+</sup>-free HBSS containing 0.2 mM EGTA and stimulated by 25 mM glucose. Changes in [cAMP]<sub>c</sub> were monitored. The result is a representative of those obtained in 50 cells. E: Experiments were carried out as shown in A and D. AUC from 0 to 5 min was calculated. [Ca<sup>2+</sup>]<sub>ex</sub>: concentration of extracellular Ca<sup>2+</sup>. F: Cells expressing Epac1-camps and dominant-negative G<sub>s</sub> were stimulated by 25 mM glucose and changes in [cAMP]<sub>c</sub> were monitored. The result is a representative of those obtained in 50 cells. G: Experiments were carried out as shown in A and F and AUC from 0 to 5 min was calculated. Values are the mean ± SE for 10 determinations. dn-G<sub>s</sub>: dominant-negative G<sub>s</sub>. \*: P < 0.01 vs control. H: Epac1-camps-expressing cells were stimulated by 25 mM glucose in the presence of 10 mM mannoheptulose. The result is a representative of those obtained in more than 25 cells. I: Epac1-camps-expressing cells were stimulated by 25 mM 3-O-methylglucose and changes in [cAMP]<sub>c</sub> were monitored. The result is a representative of those obtained in 20 cells. J: T1R3 was knocked down by using shT1R3. Control cells and T1R3-knocked down cells were stimulated by 25 mM glucose and changes in [cAMP]<sub>c</sub> were monitored. AUC from 0.3 to 2.2 min was calculated. Values are the mean ± SE for five determinations. \*: P < 0.05 vs control.

doi:10.1371/journal.pone.0144053.g004

[Fig 1A](#), glucose induced an immediate transient increase in [Ca<sup>2+</sup>]<sub>c</sub> in β-cells. This rapid elevation of [Ca<sup>2+</sup>]<sub>c</sub> has never been reported to date. This is because the elevation of [Ca<sup>2+</sup>]<sub>c</sub> was rapid and subtle, and was only detected by using a very sensitive indicator PM-Cameleon-nano15 but not by conventional Ca<sup>2+</sup> indicators such as fura-2. As demonstrated in [Fig 1D](#), loading of fura-2 abolished this rapid Ca<sup>2+</sup> signal detected by PM-Cameleon-nano15. The chelating action of fura-2 may have buffered the tiny changes in [Ca<sup>2+</sup>]<sub>c</sub>. In any case, a sensitive method enabled us to detect the immediate Ca<sup>2+</sup> signal induced by high concentration of glucose. It should be noted that, when we monitored [Ca<sup>2+</sup>]<sub>c</sub> by using a Ca<sup>2+</sup> indicator with stronger fluorescence fluo-8, we could detect the rapid peak of [Ca<sup>2+</sup>]<sub>c</sub> in a fraction of the cells ([Fig 1E](#)). This elevation is due at least partly to release of Ca<sup>2+</sup> from an intracellular pool(s) since the rapid elevation of [Ca<sup>2+</sup>]<sub>c</sub> was observed in the absence of extracellular Ca<sup>2+</sup>. Since the rapid elevation of [Ca<sup>2+</sup>]<sub>c</sub> was inhibited by an inhibitor of PLC and an inhibitor of G<sub>q</sub>, it may be due to a release of calcium from ER caused by inositol trisphosphate. This rapid elevation of [Ca<sup>2+</sup>]<sub>c</sub> was observed even if glucose metabolism was blocked by mannoheptulose, indicating that it is not dependent on glucose metabolism. Instead, the rapid elevation was blocked by lactisole, an inhibitor of T1R3 [37]. Furthermore, the rapid peak of [Ca<sup>2+</sup>]<sub>c</sub> was never observed in T1R3-null β-cells. The rapid peak of [Ca<sup>2+</sup>]<sub>c</sub> evoked by glucose is therefore caused by activation of the glucose-sensing receptor. In agreement with this notion, activation of the receptor by an administration of nonmetabolizable glucose analogue 3-O-methylglucose reproduced the rapid elevation of [Ca<sup>2+</sup>]<sub>c</sub>. Collectively, the rapid elevation of [Ca<sup>2+</sup>]<sub>c</sub> is a signal due to activation of the glucose-sensing receptor. It should be mentioned that the rapid elevation of [Ca<sup>2+</sup>]<sub>c</sub> induced by glucose is different from the elevation of [Ca<sup>2+</sup>]<sub>c</sub> induced by typical calcium-mobilizing agonists, for example, carbachol [24] in many respect. Although both glucose and carbachol may activate PLC and elevate [Ca<sup>2+</sup>]<sub>c</sub>, [Ca<sup>2+</sup>]<sub>c</sub> response induced by glucose is subtle and is not detected by fura-2 whereas that induced by carbachol is easily detectable by fura-2 [24]. Also, glucose-induced rapid elevation of [Ca<sup>2+</sup>]<sub>c</sub> was only transient and [Ca<sup>2+</sup>]<sub>c</sub> decays quickly. In addition, glucose-induced rapid elevation of [Ca<sup>2+</sup>]<sub>c</sub> is followed by a sustained decrease in [Ca<sup>2+</sup>]<sub>c</sub> while that induced by carbachol is not. Presumably, glucose and carbachol activate PLC differently and elicit slightly different [Ca<sup>2+</sup>]<sub>c</sub> signals.

The present results indicate that there are two populations of β-cells with regard to the [Ca<sup>2+</sup>]<sub>c</sub> response to glucose: roughly half of the cells presented a rapid peak of [Ca<sup>2+</sup>]<sub>c</sub> induced by glucose whereas rest of them did not. Difference in the expression levels of T1R3 would explain the different patterns of [Ca<sup>2+</sup>]<sub>c</sub> response in two populations. However, when we measured the expression of T1R3 in pancreatic islets [25] and in MIN6 cells [24], the expression of

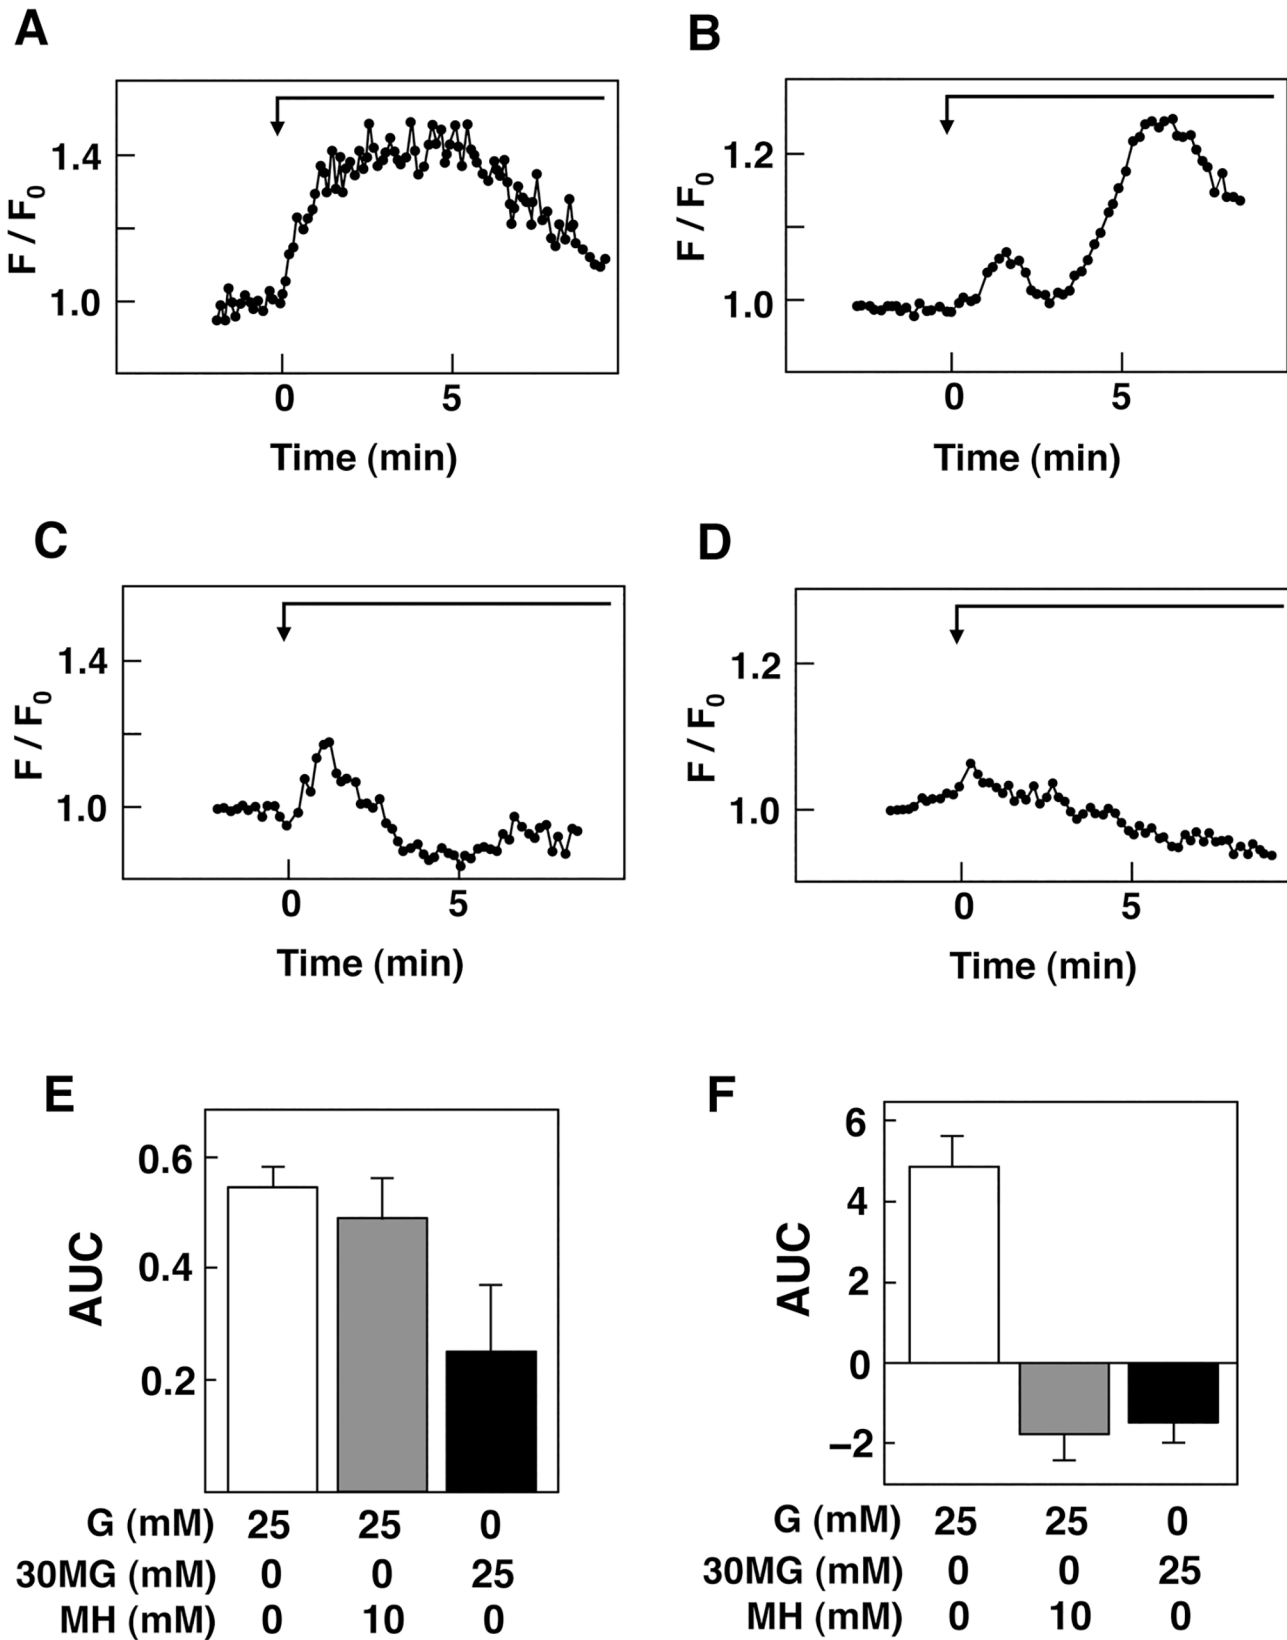

**Fig 5. Effect of Glucose on DAG and MARCKS in MIN6 Cells.** A: C1<sub>2</sub>-mRFP-expressing cells were stimulated by 25 mM glucose and changes in DAG were monitored. The result is a representative of those obtained in 20 cells. B: MARCKS-GFP-expressing cells were stimulated by 25 mM glucose and changes in MARCKS-GFP in cytoplasm were monitored. The result is a representative of those obtained in more than 100 cells. C: MARCKS-GFP-expressing cells were stimulated by 25 mM glucose in the presence of 10 mM mannoheptulose (MH) and changes in MARCKS-GFP in cytoplasm were monitored. The trace is a representative of those obtained in 20 cells. D: MARCKS-GFP-expressing cells were stimulated by 25 mM 3-O-methylglucose and changes in MARCKS-GFP in cytoplasm were monitored. E, F: Experiments were carried out as shown in A, B and C and AUC from 0.3 to 3 min (E) and from 3.3 to 8 min (F) was calculated. G: glucose, 3OMG: 3-O-methylglucose, MH: mannoheptulose.

doi:10.1371/journal.pone.0144053.g005

T1R3 was not so different among  $\beta$ -cells. Presumably, difference in the expression of other signaling molecules would be responsible for different properties found in two populations.

Previous studies have shown that glucose induced reduction of  $[Ca^{2+}]_c$ , which is due largely to sequestration of  $Ca^{2+}$  into ER through activation of SERCA [9–13]. Nonetheless, the mechanism by which glucose promotes sequestration of  $Ca^{2+}$  into ER is not certain [38]. Indeed, inhibition of the glucose-sensing receptor by lactisole [37] abolished the reduction of  $[Ca^{2+}]_c$  induced by glucose (Fig 2C). Similarly, reduction of  $[Ca^{2+}]_c$  was abolished in  $\beta$ -cells obtained from T1R3 knockout mice. Moreover, the addition of 3-O-methylglucose reproduced the reduction of  $[Ca^{2+}]_c$  induced by glucose. These results strongly suggest that the reduction of  $[Ca^{2+}]_c$  induced by glucose is mediated by the glucose-sensing receptor. At present, the mechanism by which this receptor stimulates sequestration of  $Ca^{2+}$  to ER via activation of SERCA is not totally certain. In this regard, reduction of  $[Ca^{2+}]_c$  was abolished by a  $G_q$  inhibitor and an inhibitor of PLC. The reduction of  $[Ca^{2+}]_c$  may be linked to receptor-mediated activation of PLC. When we expressed T1R3 in HEK293 cells, the addition of 25 mM glucose induced a rapid elevation of  $[Ca^{2+}]_c$  followed by sustained reduction of  $[Ca^{2+}]_c$  (unpublished observation). Reduction of  $[Ca^{2+}]_c$  following a rapid elevation of  $[Ca^{2+}]_c$  may result from a unique property of the glucose-sensing receptor. In addition, activation of T1R3 leads to reduction of  $[Ca^{2+}]_c$  at least in some occasions. In human GLP-1-secreting cells, stimulation of the glucose-sensing receptor by acesulfame-K persistently reduced  $[Ca^{2+}]_c$  [39]. The reduction of  $[Ca^{2+}]_c$  is due to activation of the plasma membrane  $Ca^{2+}$  pump (PMCA) [39]. Although the precise mechanism by which the receptor activates PMCA is still unclear, this is another example showing that binding of a ligand to the glucose-sensing receptor causes activation of the  $Ca^{2+}$  pump leading to sustained reduction of  $[Ca^{2+}]_c$ . In  $\beta$ -cells, activation of the receptor by glucose may cause activation of SERCA and reduces  $[Ca^{2+}]_c$ . Further study is obviously needed to identify the mechanism of activation of SERCA by the glucose-sensing receptor. In this regard, it is possible that increase in subplasma membrane  $Ca^{2+}$  activates SERCA and promotes uptake of  $Ca^{2+}$  to ER. Alternately, since elevation of cAMP stimulates sequestration of  $Ca^{2+}$  to ER [40], it is possible that cAMP produced by the receptor activation of  $G_s$  would cause sequestration of  $Ca^{2+}$  to ER. Further studies are needed to identify the mechanism. It should be mentioned that the reduction of  $[Ca^{2+}]_c$  induced by glucose is also dependent on glucose metabolism to some extent. This is because SERCA is an ATP-requiring enzyme and glucose elevates intracellular ATP within a minute [27]. Elevated ATP would facilitate uptake of  $Ca^{2+}$  to ER.

In the present study, we monitored the glucose effect on  $[cAMP]_c$  by paying particular attention to a rapid action of glucose. The results obtained in MIN6 cells and mouse  $\beta$ -cells show that glucose induces an immediate elevation of  $[cAMP]_c$ . Glucose-induced elevation of  $[cAMP]_c$  preceded a large oscillatory elevation of  $[Ca^{2+}]_c$  and was observed even in the absence of extracellular calcium. These results suggest that glucose-mediated elevation of  $[cAMP]_c$  is at least partly independent of elevation of  $[Ca^{2+}]_c$ . We have previously shown that the glucose-sensing receptor causes elevation of  $[cAMP]_c$  by a  $G_s$ -dependent mechanism [29]. In addition,

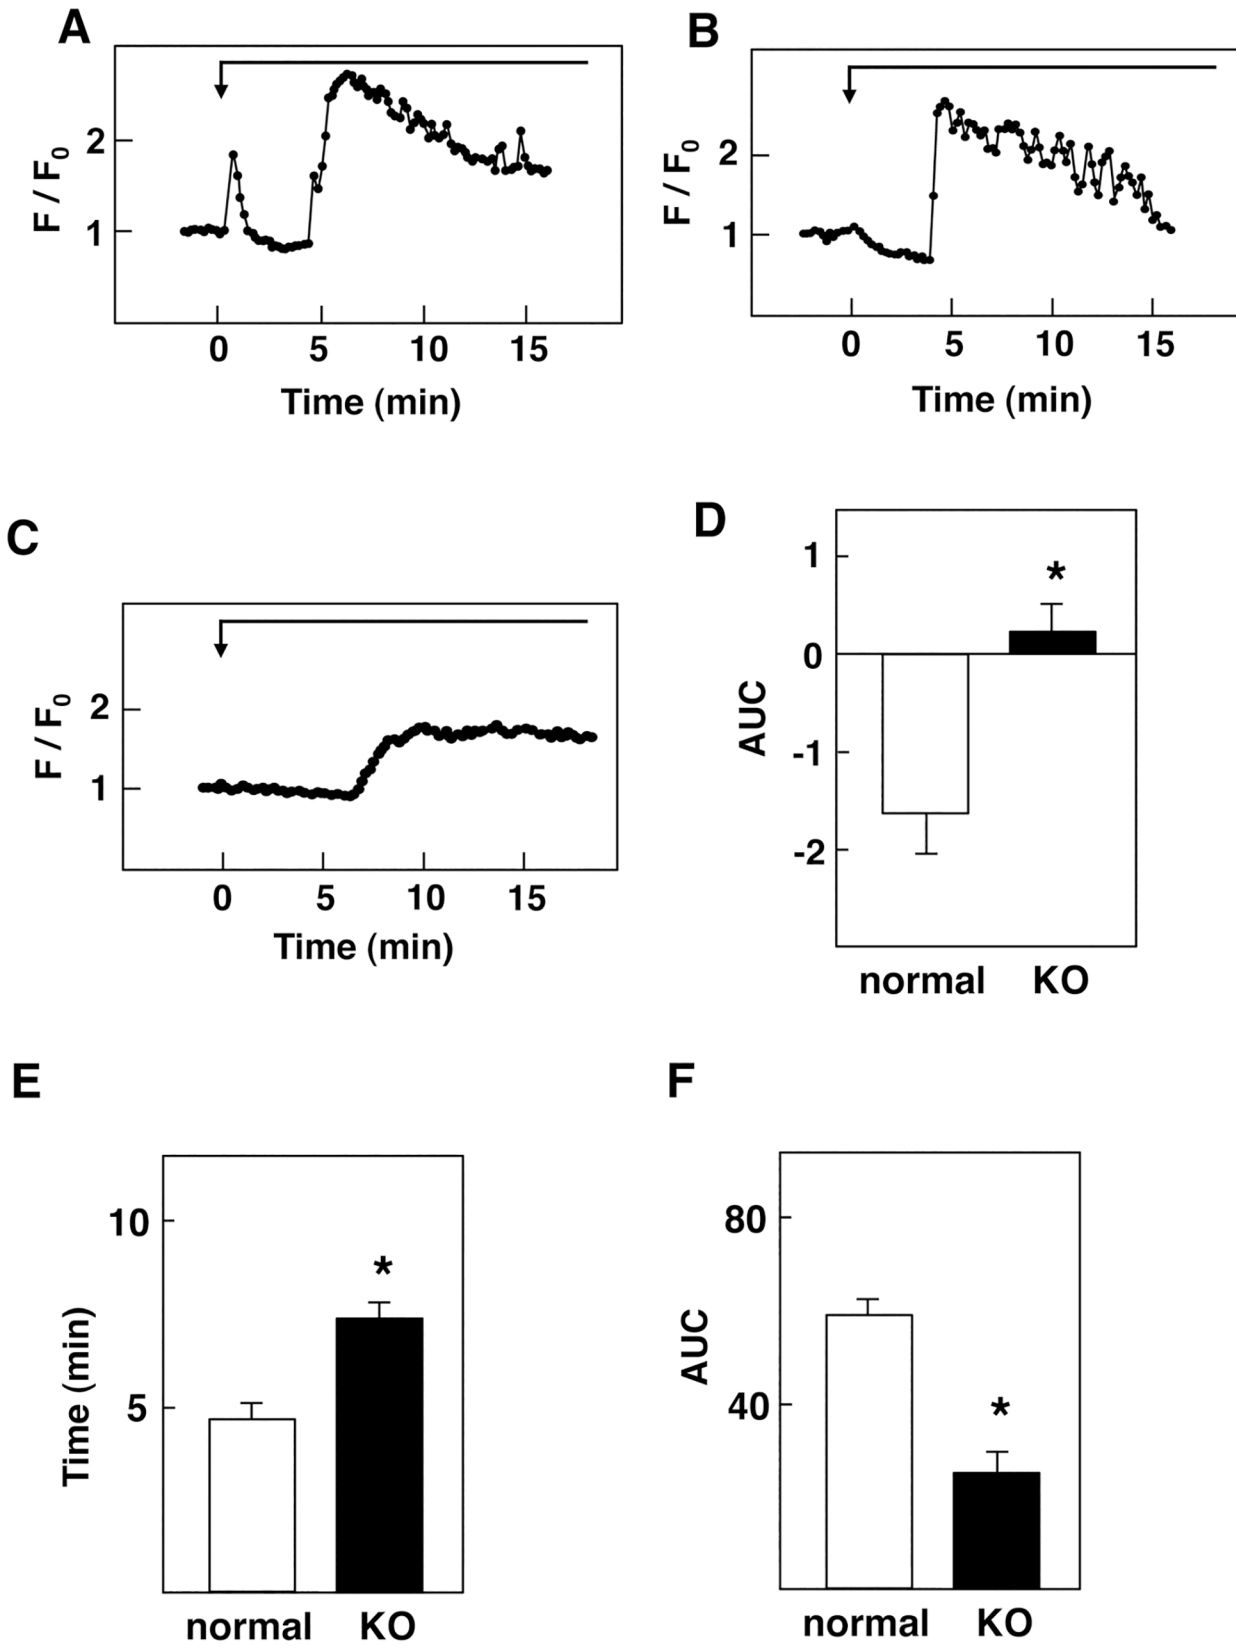

**Fig 6. Effect of  $[Ca^{2+}]_c$  in  $\beta$ -cells Obtained from Normal and T1R3 Knocked Mice.** A, B: Isolated  $\beta$ -cells obtained from normal mouse were stimulated by 16.7 mM glucose and changes in  $[Ca^{2+}]_c$  were monitored by using fluo-8. Two types of responses, with (A) or without (B) a rapid peak of  $[Ca^{2+}]_c$ , were obtained. C: Isolated  $\beta$ -cells obtained from T1R3 knockout mouse were stimulated by 16.7 mM glucose and changes in  $[Ca^{2+}]_c$  were monitored by using fluo-8. The result is a representative of those obtained in more than 100 cells. D: Experiments were carried out as shown in A, B and C and AUC from 2 to 5 min were calculated. Values are the mean  $\pm$  SE for 20 determinations. \*:  $P < 0.01$  vs normal. E: Experiments were carried out as shown in A, B and C. The latent period until the initiation of oscillatory elevation of  $[Ca^{2+}]_c$  was measured. Values are the mean  $\pm$  SE for 20 determinations. \*:  $P < 0.05$  vs normal. F: Experiments were carried out as shown A, B and C. AUC from 5 to 15 min was calculated. Values are the mean  $\pm$  SE for 20 determinations. \*:  $P < 0.01$  vs normal.

doi:10.1371/journal.pone.0144053.g006

activation of the glucose-sensing receptor by 3-O-methylglucose increases  $[cAMP]_c$  (Fig 4I). Our results are in agreement with the report by Kim et al. [22] and Fridlyand et al. [41]. However, our results are not consistent with previous reports showing that elevation of  $[cAMP]_c$  is secondary to the elevation of  $[Ca^{2+}]_c$  [18]. The reason for the discrepancy is not totally certain. However, our measurement was focused on the early response of  $[cAMP]_c$  in  $\beta$ -cells. It is likely that at least rapid elevation of  $[cAMP]_c$  is caused by receptor-mediated activation of  $G_s$ .

In the present study, we also showed that glucose induced rapid and long-lasting activation of protein kinase C by showing that glucose induces biphasic increase in phosphorylated MARCKS in cytosol. It has been generally thought that glucose activates protein kinase by elevating  $[Ca^{2+}]_c$  [42]. In  $\beta$ -cells, elevation of  $[Ca^{2+}]_c$  would activate calcium-dependent PLC leading to generation of DAG [43]. Alternately, high concentration of glucose stimulates *de novo* synthesis of DAG by supplying a substrate [44]. In any event, it has been thought that activation of protein kinase C is dependent on glucose metabolism and is rather slow in onset. As shown in Fig 3B, however, phosphorylation of MARCKS was detected within 10 seconds and increase in DAG was also detected within 10 sec. Furthermore, at least the first phase of elevation of phosphorylated MARCKS was independent of glucose metabolism and was reproduced by a nonmetabolizable glucose analogue. Our previous results show that the glucose-sensing receptor is coupled to the PLC-calcium messenger system [24]. Collectively, a rapid activation of protein kinase C may be independent of glucose metabolism and is caused by receptor-mediated activation of PLC.

The present study demonstrates for the first time that glucose evokes rapid intracellular signals,  $Ca^{2+}$  and cAMP, in pancreatic  $\beta$ -cells. These actions are independent of the glucose metabolism and are mediated by the glucose-sensing receptor. Importantly, inhibition of the receptor or deletion of the T1R3 gene attenuates glucose-induced insulin secretion [37, 45]. Specifically, insulin secretion is markedly delayed and blunted in  $\beta$ -cells obtained from T1R3 knockout mice [45]. Hence, these receptor-mediated rapid signals are critical for the glucose action in  $\beta$ -cells. Collectively, the action of glucose is not solely dependent on its metabolism [46]. The glucose-sensing receptor generates rapid signals and, by priming the metabolic pathway, enhances the pathway dependent on the glucose metabolism [26]. Our results are different from the postulate by Kyriazis et al. [47] that the sweet taste receptor inhibits basal secretion of insulin. As we mentioned previously [37], their conclusion is solely dependent on the results obtained by using a T1R3 inhibitor lactisole. Moreover, their data may result from an inadequate use of lactisole [37]. In fact, their results obtained by lactisole are even contradictory to their own results [47, 48]. More importantly, glucose-induced insulin secretion is obviously attenuated in T1R3-null  $\beta$ -cells both in vitro [37, 45] and in vivo [49], it is certain that T1R3 is involved in the action of glucose in pancreatic  $\beta$ -cells.

In summary, we identified the intracellular signals evoked by glucose via the activation of the glucose-sensing receptor. These rapid signals may be important for the priming of the metabolic pathway [26, 27] and for rapid secretion of insulin [37, 45].



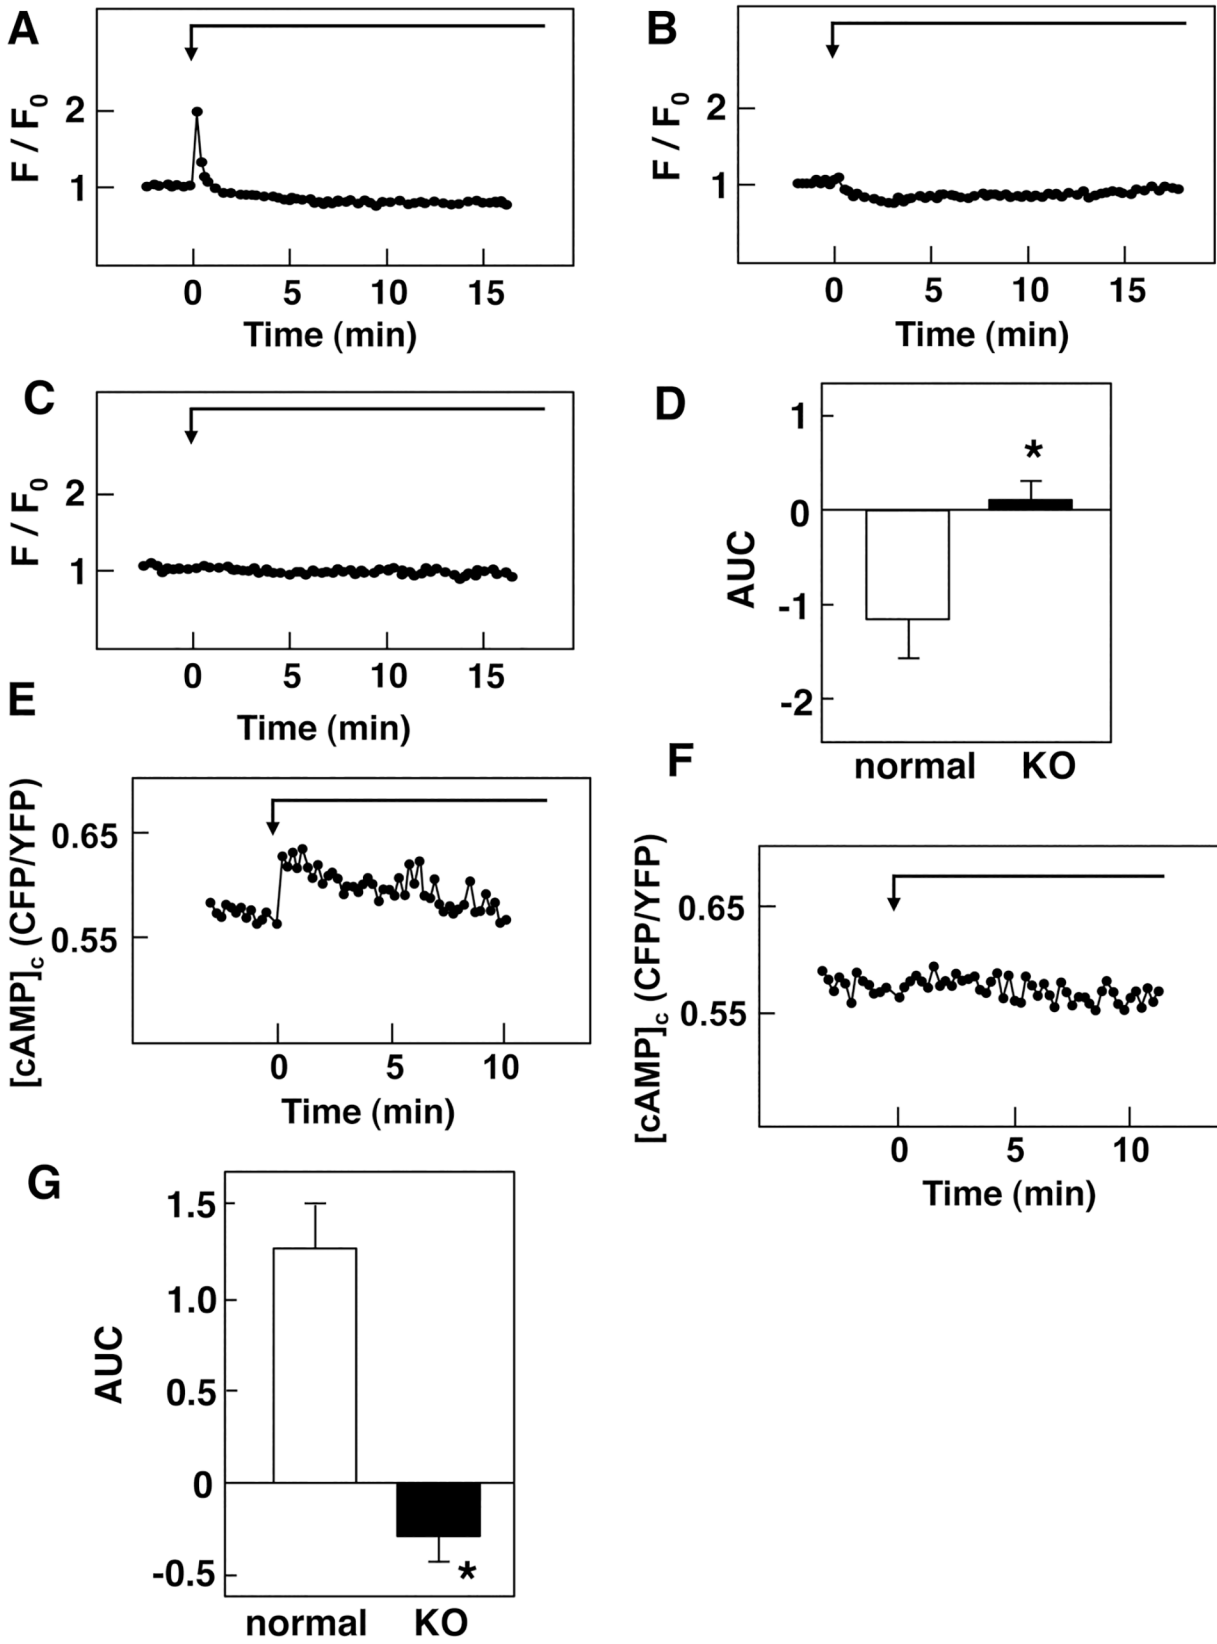

**Fig 7. Effect of 3-O-Methylglucose on  $[Ca^{2+}]_c$  and  $[cAMP]_c$  in  $\beta$ -cells Obtained from Normal and T1R3 Knocked Mice.** A, B: Isolated  $\beta$ -cells obtained from normal mice were stimulated by 16.7 mM 3-O-methylglucose and changes in  $[Ca^{2+}]_c$  were measured by using fluo-8. Two types of responses, with (A) or without (B) a rapid peak of  $[Ca^{2+}]_c$ , were obtained. C: Isolated  $\beta$ -cells obtained from T1R3 knocked mice were stimulated by 16.7 mM 3-O-methylglucose and changes in  $[Ca^{2+}]_c$  were monitored by using fluo-8. D: Experiments were carried out as shown in A, B and C and AUC from 1 to 5 min were calculated. Note that each value was subtracted by the basal value, which was the mean of the prestimulated values. Values are the mean  $\pm$  SE for 20 determinations. \*:  $P < 0.05$  vs control. E, F: Epac1-camps-expressing  $\beta$ -cells obtained from normal (E) and T1R3 knockout (F) mice were stimulated by 16.7 mM glucose and changes in  $[cAMP]_c$  were monitored. The results are the representative of those obtained in more than 20 cells. G: Experiments were carried out as shown in E and F and AUC from 0 to 5 min was calculated. Values are the mean  $\pm$  SE for 20 cells. \*:  $P < 0.01$  vs control.

doi:10.1371/journal.pone.0144053.g007

## Acknowledgments

We are grateful to M. Lohse (Würzburg, Germany) for provision of Epac-1-camps. The authors thank Mayumi Odagiri for secretarial assistance.

## Author Contributions

Conceived and designed the experiments: IK. Performed the experiments: YN JM. Analyzed the data: YN. Contributed reagents/materials/analysis tools: MN. Wrote the paper: IK.

## References

- Rasmussen H, Zawulich KC, Ganeson S, Calle R, Zawulich WS. Physiology and pathophysiology of insulin secretion. *Diab Care*. 1990; 13: 655–666.
- Henquin JC. Regulation of insulin secretion: a matter of phase control and amplitude modulation. *Diabetologia*. 2009; 52: 739–751. doi: [10.1007/s00125-009-1314-y](https://doi.org/10.1007/s00125-009-1314-y) PMID: [19288076](https://pubmed.ncbi.nlm.nih.gov/19288076/)
- Rorsman P. The pancreatic beta-cells as a fuel sensor: an electrophysiologist's viewpoint. *Diabetologia*. 1997; 40: 487–498. PMID: [9165215](https://pubmed.ncbi.nlm.nih.gov/9165215/)
- Henquin JC, Meissner HP. Significance of ionic fluxes and changes in membrane potential for stimulus-secretion coupling in pancreatic B-cells. *Experientia*. 1984; 40: 1043–1052. PMID: [6386515](https://pubmed.ncbi.nlm.nih.gov/6386515/)
- Ashcroft FM, Rorsman P. Electrophysiology of the pancreatic B-cell. *Prog Biophys Mol Biol*. 1989; 54: 87–143. PMID: [2484976](https://pubmed.ncbi.nlm.nih.gov/2484976/)
- Dean PM, Mathew EK. Electrical activity in pancreatic islet cells. *Nature*. 1968; 219: 389–390. PMID: [4873864](https://pubmed.ncbi.nlm.nih.gov/4873864/)
- Cook DL, Hales CN. Intracellular ATP directly blocks  $K^+$ -channels in pancreatic B-cells. *Nature*. 1984; 312: 271–273.
- Rorsman P, Trube G. Glucose-dependent  $K^+$ -channels in pancreatic  $\beta$ -cells are regulated by intracellular ATP. *Pflüger Arch*. 1985; 405: 305–309.
- Rorsman P, Abrahamsson H, Gylfe E, Hellman B. Dual effects of glucose on the cytosolic  $Ca^{2+}$  activity of mouse pancreatic  $\beta$ -cells. *FEBS Lett*. 1984; 170: 196–200. PMID: [6373371](https://pubmed.ncbi.nlm.nih.gov/6373371/)
- Grapengiesser E, Gylfe E, Hellman B. Glucose induced oscillation of cytoplasmic  $Ca^{2+}$  in the pancreatic  $\beta$ -cell. *Biochem Biophys Res Commun*. 1988; 151: 1299–1394. PMID: [3281672](https://pubmed.ncbi.nlm.nih.gov/3281672/)
- Yada T, Kake M, Tanaka H. Single pancreatic  $\beta$ -cells from neonatal rats exhibits as initial decrease and subsequent increase in cytosolic free  $Ca^{2+}$  in response to glucose. *Cell Calcium*. 1992; 13: 69–76. PMID: [1540989](https://pubmed.ncbi.nlm.nih.gov/1540989/)
- Roe MW, Merts RJ, Lancaster ME, Worley JF, Dukes ID. Thapsigargin inhibits the glucose-induced decrease of intracellular  $Ca^{2+}$  in mouse islets of Langerhans. *Am J Physiol*. 1994; 266: E852–E862. PMID: [8023914](https://pubmed.ncbi.nlm.nih.gov/8023914/)
- Chow RH, Lund PE, Loser S, Panten U, Gylfe E. Coincidence of early glucose-induced depolarization with lowering of cytoplasmic  $Ca^{2+}$  in mouse pancreatic  $\beta$ -cells. *J Physiol*. 1995; 485: 607–617. PMID: [7562604](https://pubmed.ncbi.nlm.nih.gov/7562604/)
- Tengholm A, Hellman B, Gylfe E. The endoplasmic reticulum is a glucose-modulated high-affinity sink for  $Ca^{2+}$  in mouse pancreatic  $\beta$ -cells. *J Physiol*. 2001; 530: 533–540. PMID: [11158282](https://pubmed.ncbi.nlm.nih.gov/11158282/)
- Ravier MA, Daro D, Rama LP, Jonas JC, Cheng-Xue R, Schuit FC, et al. Mechanism of control of the free  $Ca^{2+}$  concentration in the endoplasmic reticulum of mouse pancreatic  $\beta$ -cells: interplay with cell metabolism and  $[Ca^{2+}]_c$  and role of SERCA2b and SERCA3. *Diabetes*. 2011; 60: 2533–2545. doi: [10.2337/db10-1543](https://doi.org/10.2337/db10-1543) PMID: [21885870](https://pubmed.ncbi.nlm.nih.gov/21885870/)
- Charles M, Franska R, Schmid F, Forsham P, Grodsky G. Adenosine 3', 5'-monophosphate in pancreatic islets: glucose-induced insulin release. *Science*. 1973; 179: 569–571. PMID: [4346825](https://pubmed.ncbi.nlm.nih.gov/4346825/)

17. Gill V, Cerasi E. Activation of adenylyl cyclase in pancreatic islets of the rat. *FEBS Lett.* 1973; 33: 311–314. PMID: [4353994](#)
18. Landa LJ, Harbeck M, Kaihara K, Chepurny O, Kitiphongspattana K, Graf O, et al. Interplay of Ca<sup>2+</sup> and cAMP signaling in the insulin-secreting MIN6 beta-cell line. *J Biol Chem.* 2005; 280: 31294–31302. PMID: [15987680](#)
19. Furman B, Ong WK, Pyne NJ. Cyclic AMP signaling in pancreatic islets. *Adv Exp Med Biol.* 2010; 654: 281–304. doi: [10.1007/978-90-481-3271-3\\_13](#) PMID: [20217503](#)
20. Leech C, Castonguay M, Harbener J. Expression of adenylyl cyclase subtypes in pancreatic beta-cells. *Biochem Biophys Res Commun.* 1999; 254: 703–706. PMID: [9920805](#)
21. Delmeire D, Flamez D, Hinke S, Cali J, Pipeleers D, Schuit F. Type VIII adenylyl cyclase in rat beta cells: coincidence signal detector/generator for glucose and GLP-1. *Diabetologia.* 2003; 46: 1383–1393. PMID: [13680124](#)
22. Kim J, Roberts C, Berg S, Caicedo A, Roper S, Chaudhari N. Imaging cyclic AMP changes in pancreatic islets of transgenic reporter mouse. *PLoS ONE.* 2008; 3: e2127. doi: [10.1371/journal.pone.0002127](#) PMID: [18461145](#)
23. Nelson G, Hoon MA, Chandrasekar J, Zhang Y, Ryba NJP, Zuker C. Mammalian sweet taste receptors. *Cell.* 2001; 106: 381–390. PMID: [11509186](#)
24. Nakagawa Y, Nagasawa M, Yamada S, Hara A, Mogami H, Nikolaev VO, et al. Sweet taste receptor expressed in pancreatic  $\beta$ -cells activates the calcium and cyclic AMP signaling systems and stimulates insulin secretion. *PLoS ONE.* 2009; 4: e5106. doi: [10.1371/journal.pone.0005106](#) PMID: [19352508](#)
25. Medina A, Nakagawa Y, Ma J, Li L, Hamano K, Akimoto T, et al. Expression of the glucose-sensing receptor T1R3 in pancreatic islet: changes in the expression levels in various nutritional and metabolic states. *Endocr J.* 2014; 61: 797–895. PMID: [24898279](#)
26. Kojima I, Nakagawa Y, Ohtsu Y, Hamano K, Medina J, Nagasawa M. Return of the glucoreceptor: glucose activates the glucose-sensing receptor T1R3 and facilitates metabolism in pancreatic  $\beta$ -cells. *J Diab Invest.* 2015; 6: 256–263.
27. Nakagawa Y, Ohtsu Y, Nagasawa M, Shibata H, Kojima I. Glucose promotes its own metabolism by acting on the cell-surface glucose-sensing receptor T1R3. *Endocr J.* 2014; 61: 119–131. PMID: [24200979](#)
28. Miyazaki J, Yamato E, Ikegami H, Asano T, Shibasaki Y, Oka Y, et al. Establishment of a pancreatic beta cell line that retains glucose-inducible insulin secretion: special reference to expression of glucose transporter isoforms. *Endocrinology.* 1990; 127: 126–132. PMID: [2163307](#)
29. Nakagawa Y, Nagasawa M, Mogami H, Lohse M, Ninomiya Y, Kojima I. Multimodal function of the sweet taste receptor expressed in pancreatic  $\beta$ -cells: generation of diverse patterns intracellular signals by sweet agonists. *Endocr J.* 2013; 60: 1191–1206. PMID: [23933592](#)
30. Nikolaev DV, Bunemann M, Hein L, Hannawacker A, Lohse MJ. Novel single chain cAMP sensors for receptor-mediated signal propagation. *J Biol Chem.* 2004; 279: 37215–37218. PMID: [15231839](#)
31. Suzuki Y, Zhang H, Saito N, Kojima I, Urano T, Mogami H. GLP-1 activate protein kinase C through Ca<sup>2+</sup>-dependent activation of phospholipase C in insulin-secretion cells. *J Biol Chem.* 2006; 281: 28499–28507. PMID: [16870611](#)
32. Nagasawa M, Kojima I. Translocation of TRPV2 channel induced by focal administration of mechanical stress. *Physiol Rep.* 2015; 3: e12296. doi: [10.14814/phy2.12296](#) PMID: [25677550](#)
33. Adachi E, Kazoe Y, Sato Y, Suzuki Y, Urano T, Ueyama T, et al. A technique for monitoring multiple signals with a combination of prism-based total internal reflection fluorescence microscopy and epifluorescence microscopy. *Pflugers Arch.* 2009; 456: 227–234.
34. Hirokawa K, Yamada Y, Matsuda K, Kobayashi M, Hashimoto T, Matsuura M, et al. Spontaneous network activity visualized by ultrasensitive Ca<sup>2+</sup> indicators, yellow Cameleon-nano. *Nat Methods.* 2010; 7: 729–732. doi: [10.1038/nmeth.1488](#) PMID: [20693999](#)
35. Bleasdale JE, Thakur NR, Gremban RS, Bundy GL, Fitzpatrick FA, Smith RJ, et al. Selective inhibition of receptor-coupled phospholipase C-dependent processes in human platelets and polymorphonuclear neutrophils. *J Pharmacol Exp Ther.* 1990; 255: 756–768.
36. Takasaki J, Saito T, Taniguchi M, Kawasaki T, Moritani T. A novel G<sub>q/11</sub>-selective inhibitor. *J Biol Chem.* 2004; 279: 47438–47445. PMID: [15339913](#)
37. Hamano K, Nakagawa Y, Ohtsu Y, Li L, Medina J, Tanaka Y, et al. Lactisole: an inhibitor of the glucose-sensing receptor T1R3 expressed in pancreatic  $\beta$ -cells. *J Endocrinol.* 2015; 226: 57–66. doi: [10.1530/JOE-15-0102](#) PMID: [25994004](#)
38. Hellman B, Grapengiesser E. Glucose-induced inhibition of insulin secretion. *Acta Physiol.* 2014; 210: 479–488.

39. Ohtsu Y, Nakagawa Y, Nagasawa M, Takeda S, Arakawa H, Kojima I. Diverse signaling systems activated by the sweet taste receptor in human GLP-1-secreting cells. *Mol Cell Endocrinol*. 2014; 394: 70–79. doi: [10.1016/j.mce.2014.07.004](https://doi.org/10.1016/j.mce.2014.07.004) PMID: [25017733](https://pubmed.ncbi.nlm.nih.gov/25017733/)
40. Yaekura K, Yada T. Cytosolic Ca<sup>2+</sup>-reducing action of cAMP in rat pancreatic  $\beta$ -cells: involvement of thapsigargin-sensitive stores. *Am J Physiol*. 1998; 274: C513–C521. PMID: [9486142](https://pubmed.ncbi.nlm.nih.gov/9486142/)
41. Fridlyand LE, Harbeck MC, Roe MW, Philipson LH. Regulation of cAMP dynamics by Ca<sup>2+</sup> and G protein-coupled receptors in the pancreatic  $\beta$ -cell: a computational approach. *Am J Physiol*. 2007; 293: C1924–C1933.
42. Ganesan S, Calle R, Zawalich K, Greenwalt K, Zawalich W, Shulman GI, et al. Immunocytochemical localization of alpha-protein C in rat pancreatic  $\beta$ -cells during glucose-induced insulin secretion. *J Cell Biol*. 1992; 119: 313–324. PMID: [1400576](https://pubmed.ncbi.nlm.nih.gov/1400576/)
43. Mogami H, Zhang H, Suzuki Y, Urano T, Saito N, Kojima I, et al. Decoding of short-lived Ca<sup>2+</sup> influx signals into long term substrate phosphorylation through activation of two distinct classes of protein kinase C. *J Biol Chem*. 2003; 278: 9896–9904. PMID: [12514176](https://pubmed.ncbi.nlm.nih.gov/12514176/)
44. Wolf BA, Easom RA, McDaniel ML, Turk J. Diacylglycerol synthesis de novo from glucose by pancreatic islets isolated from rats and humans. *J Clin Invest*. 1990; 85: 482–490. PMID: [2405021](https://pubmed.ncbi.nlm.nih.gov/2405021/)
45. Geraedts MC, Takahashi T, Vignes S, Markwardt MC, Nkobena A, Cockerham RE, et al. Transformation of postingestive glucose responses after deletion of sweet taste receptor subunits or gastric bypass surgery. *Am J Physiol*. 2012; 303: E464–E474.
46. Matschinsky FM. Glucokinase as glucose sensor and metabolic signal generator in pancreatic  $\beta$ -cells and hepatocytes. *Diabetes*. 1990; 39: 647–652. PMID: [2189759](https://pubmed.ncbi.nlm.nih.gov/2189759/)
47. Kyriazis GA, Smith KR, Tyberg B, Hummain T, Pratlly RE. Sweet taste receptor regulates basal secretion and contribute to compensatory insulin hypersecretion during the development of diabetes in male mice. *Endocrinology*. 2014; 155: 2112–2121. doi: [10.1210/en.2013-2015](https://doi.org/10.1210/en.2013-2015) PMID: [24712876](https://pubmed.ncbi.nlm.nih.gov/24712876/)
48. Kyriazis GA, Soundarapandian MM, Tyberg B. Sweet taste receptor signaling in  $\beta$ -cells mediates fructose-induced potentiation of glucose-stimulated insulin secretion. *Proc Natl Acad Sci USA*. 2012; 109: E524–E532. doi: [10.1073/pnas.1115183109](https://doi.org/10.1073/pnas.1115183109) PMID: [22315413](https://pubmed.ncbi.nlm.nih.gov/22315413/)
49. Murovets VO, Bachmanov AA, Zolotarev VA. Impaired glucose metabolism in mice lacking Tas1r3 taste receptor gene. *PLoS ONE*. 2015; 10: e130997.
